# Supplementary material for: The geometry of decision-making in individuals and collectives
Source: PubMed Central journal article supplement (PMC8685676; doi:10.1073/pnas.2102157118), 2021-12-08
Supplement: pnas.2102157118.sapp.pdf [file pnas.2102157118.sapp.pdf]

1

## 2 **Supplementary Information for**

### 3 **The geometry of decision-making in individuals and collectives**

4 **Vivek H. Sridhar, Liang Li, Dan Gorbonos, Máté Nagy, Bianca R. Schell, Timothy Sorochkin, Nir S. Gov and Iain D. Couzin**

5 **Corresponding Authors: Vivek H. Sridhar, Liang Li and Iain D. Couzin.**

6 **E-mail: [vivekhsridhar@gmail.com](mailto:vivekhsridhar@gmail.com), [lli@ab.mpg.de](mailto:lli@ab.mpg.de) and [icouzin@ab.mpg.de](mailto:icouzin@ab.mpg.de)**

#### 7 **This PDF file includes:**

- 8 Materials and Methods
- 9 Supplementary text
- 10 Figs. S1 to S19
- 11 Tables S1 to S2
- 12 SI References

## 13 Materials and Methods

### 14 1. Neural decision-making model

15 **1.1 Overview.** We construct a computational model of neural decision-making that takes in a representation of directions to the  
16 different targets as input, and outputs a collective vectorial representation of the agent’s future velocity (adapted from (1)).  
17 This provides us explicit predictions for animal trajectories, allows us to determine which target is reached in each realization  
18 of the simulation, and facilitates direct comparison with experimental tests. Our model is within the class of widely-employed  
19 neural ring-attractor models (see section 1.8, below), which like neural field models (2, 3), and attractor network models more  
20 generally (4–6), consider the collective firing activity of the neurons, or the firing rate, as opposed to the microscopic state of  
21 each firing neuron.

22 Neural activity/firing rate models are very widely employed in neuroscience, having been applied to almost every area of  
23 study, from perception (7–9) to memory (10) and decision-making (11, 12). As has been found in the study of dynamical  
24 systems and statistical physics more generally, the governing equations in such systems often do not depend on microscopic  
25 details (13, 14). For example, just as it is not necessary to model molecular dynamics to simulate an individual neuron, many  
26 possible details of the individual components of a network do not influence the general collective dynamics exhibited, thus  
27 allowing for abstraction and a focus on revealing and understanding general principles (for an example of work that shows  
28 there exists an exact correspondence between physiological properties such as the mean firing rate and membrane potential  
29 within the network and low-dimensional dynamical properties, see (15)).

30 In direct relation to the present study, it has been established that there are ring-attractor dynamics in the *Drosophila* brain  
31 (16), and further, that the dynamics of this neural system appear to be highly robust to microscopic details. For example,  
32 (6) developed a detailed, physiologically-parameterized model, incorporating spiking neurons, with connectivity derived from  
33 microscopy of detailed neuronal morphologies in fruit flies. They found that their model behaved like a ring-attractor under a  
34 wide range of parameters, and that the ring-attractor properties were highly robust to physiological details, such as variation  
35 in synaptic weights. They concluded that “the ring-attractor computation is a robust output of this circuit, apparently  
36 arising from its high-level network properties (topological configuration, local excitation and long-range inhibition) rather than  
37 fine-scale biological detail”. Further studies have shown that, in general, the attractor states of ring-attractor neural dynamics  
38 can be described by a low-level family of functions and thus that the solutions do not require, or depend on, explicit simulation  
39 of the neuronal dynamics (see (17) for details).

40 This is not to say that models accounting for individual neuronal properties and connectivity will not also be of importance.  
41 As we emphasise in our main manuscript, it is likely that detailed models will likely be able to better quantitatively fit specific  
42 systems. As (6) suggest, such models may prove helpful in understanding how thermogenetic and optogenetic manipulations to  
43 that specific network could impact behavior of specific organisms; but this will come at the cost of analytic tractability, and  
44 thus a weakened ability identify key principles that transcend system specifics. Thus, both (non-mutually-exclusive) approaches  
45 to modelling neural systems are valuable, depending on the purpose of scientific study.

46 **1.2 Framework.** In our model, the brain is composed of individual components, called “spins”, that, collectively, as a “spin  
47 system”, represent neural activity. Spin systems, which have been long-studied in physics due to their ability to give insight  
48 into a wide range of collective phenomena, from magnetic (18) to quantum (19) systems, were first introduced in the study of  
49 neurobiology by Hopfield in a landmark paper (20) that provided considerable insights into principles underlying unsupervised  
50 learning and associative memory. In its simplest (and most common) formulation, as in Hopfield networks, a spin system is  
51 comprised of entities, spins, that can each be in state 0 or 1, or in the terminology of physics either ‘up’ or ‘down’. While  
52 at first appearing an almost absurd oversimplification of reality, spin systems have proven themselves by providing some of  
53 the deepest understanding of complex collective phenomena, and especially the universal properties, regardless be they spins,  
54 iron atoms or water molecules, undergoing phase transitions (21). More recently, it has since been shown, via analysis of real  
55 spiking neural networks, that such models are not only consistent with experimental data across scales, but that this similarity  
56 is not just an analogy or metaphor (see (22) for details of their system and analysis).

57 In our case, we do not imply that a spin is equivalent to a neuron, but rather, as we show via a mathematical derivation  
58 below, that the collective properties of interacting spins in our model is equivalent to the firing rate in the neural ring attractor  
59 model (see section 1.8 For details). Consequently, we refer to the individual components with which we model our system  
60 as “spins”, and “neural activity” as a term to represent this “firing rate” equivalent. Our model is deliberately simple, our  
61 intention being to make robust predictions that transcend system specifics, and to establish the causal nature of the properties  
62 seen via mathematical analysis. Thus, a benefit of our chosen formulation is that we can take advantage of its analytic  
63 tractability, as well as the large body of knowledge regarding collective properties of spin systems, including a well-defined  
64 notion of stochasticity (noise), while also ensuring it is within the class of ring-attractor models that are so widely-employed in  
65 neuroscience.

66 Here, the brain is characterized by a recurrent neural network composed of  $N$  spins. Each spin  $i$  encodes direction to one of  
67 the presented goals  $\hat{p}_i$ , and exists in one of two states:  $\sigma_i = 0$  or  $\sigma_i = 1$ . Since each spin exists in one of two states, there are  
68  $2^N$  possible system configurations. Energy of the system (for any given configuration) is given by its Hamiltonian,  $H$ .

$$H = -\frac{k}{N} \sum_{i \neq j} J_{ij} \sigma_i \sigma_j \quad [1]$$

69 where,  $k$  is the number of options available to the animal and  $J_{ij}$  is the interaction strength between spins  $i$  and  $j$ . A positive  
70  $J_{ij}$  indicates an excitatory interaction between spin  $i$  and spin  $j$  while a negative  $J_{ij}$  indicates an inhibitory interaction.  
71 Here, we assume that interactions are excitatory when spins encode a similar directional preference, and inhibitory when  
72 they encode conflicting directional preferences. This captures both explicit ring-attractor networks, with local excitation and  
73 long-range/global inhibition (as found in fruit flies, and other insects (16)), and computation among distributed competing  
74 neural groups (as in the mammalian brain (23)). The locality of excitatory interactions encoded by  $J_{ij}$ , or directional tuning of  
75 the spins is given by the tuning parameter  $\nu$ . Here,  $J_{ij}$  is given by

$$J_{ij} = \cos \left( \pi \left( \frac{|\theta_{ij}|}{\pi} \right)^\nu \right) \quad [2]$$

76 where,  $\theta_{ij}$  is the angle between preferred directions of spins  $i$  and  $j$ , and  $\nu$  represents the neural tuning parameter. For  $\nu = 1$ ,  
77 the interactions become ‘‘cosine-shaped’’  $J_{ij} = \cos(\theta_{ij})$ , and the network has a Euclidean representation of space (Fig. S1). For  
78  $\nu < 1$ , the network has more local excitation and encodes space in a non-Euclidean manner (Fig. S1). For sake of simplicity,  
79 we assume a fully-connected network. At each timestep, energy of the system  $H$  is minimized using the Metropolis-Hastings  
80 algorithm i.e. a change in neural state  $\sigma_i$  is dependent on the change of energy ( $\Delta H$ ) that accompanies it.

$$P_{1 \rightarrow 0/0 \rightarrow 1}^{(i)} = \begin{cases} \exp(-\Delta H/T) & \Delta H \geq 0 \\ 1 & \Delta H < 0 \end{cases} \quad [3]$$

81 where  $P_{1 \rightarrow 0/0 \rightarrow 1}^{(i)}$  is the probability that a spin switches its state and  $\Delta H = H_2 - H_1$  where  $H_1$  is the energy of the system  
82 before the spin changes its state and  $H_2$  is its energy after the change in state. This is akin to other Ising spin models where  
83 the temperature parameter  $T$  is interpreted here as neural noise. The agent then moves with a velocity  $\vec{V}$  determined by the  
84 normalized sum of goal vectors  $\hat{p}_i$  of all active spins.

$$\vec{V} = \frac{v_0}{N} \sum_{i=1}^N \hat{p}_i \sigma_i \quad [4]$$

85 where  $v_0$  is the proportionality constant. The agent moves along  $\vec{V}$  and spins update their goal vector  $\hat{p}_i$  to reflect the agent’s  
86 movement. The goal vector  $\hat{p}_i$  now points from the agent’s updated location to the spin’s preferred goal with directional noise  
87 chosen from a circularly wrapped Gaussian distribution centered at 0 with a standard deviation  $\sigma_e$ .

88 **1.3 Simulations.** We simulated an agent with sixty spins that is tasked with decision-making in an environment containing  
89 multiple (two–seven) targets (using seventy spins for the seven target case). Each spin was assigned a preference for one of the  
90 available targets which determined its goal vector  $\hat{p}_i$ . For each simulation run, the agent was reinitialized at (0, 0) and the  
91 targets were set at a distance of 5 units, corresponding to 5 m in the fly experiments. In the two-target case, the targets were  
92 separated by 60° putting them at (4.33, -2.5) and (4.33, 2.5) respectively. In the three-target case, successive targets were  
93 initialized to be 40° apart putting them at (3.83, -3.21), (5, 0) and (3.83, 3.21) respectively. We ran 500 replicate simulations  
94 for each condition.

95 To demonstrate sensitivity of this algorithm, we examine the effect of varying the proportion of spins pointing to a target,  
96 on the probability that it is chosen (Fig. S3D and E). The slope of the sigmoid here indicates how a small change in the  
97 proportion of spins encoding a target is amplified to maximize decision accuracy. We also vary the agent’s starting position,  
98 distance to the target, and the neural tuning  $\nu$  to illustrate the effect these parameters on the bifurcation angle (Fig. S3A-C).

99 Finally, we also simulate a scenario where the agent is restricted in motion only allowing movement in the direction  
100 perpendicular to direction to the targets. These simulations are meant to mimic a social decision-making scenario where the  
101 animal chooses to follow one of several moving conspecifics at a fixed distance behind them (see Fig. 3 in main text). Once  
102 again, the agent was initialized at (0, 0) while the targets were placed at a fixed distance  $d$  along the  $x$ -axis. We varied lateral  
103 distance between the targets such that their centroid was always at  $(d, 0)$  and recorded the agent’s trajectory along the  $y$ -axis.  
104 Corresponding experiments were conducted with larval zebrafish (see Section 5 for experimental details).

105 **1.4 Parameter choice.** Our model is composed of two ‘free’ parameters, the neural noise parameter ( $T$ ) and the neural tuning  
106 parameter ( $\nu$ ). Here, we will discuss the values chosen for these parameters and their biological interpretation.

107 **1.4.1 Neural noise.** The neural noise parameter  $T$  represents the intrinsic spontaneous activity, a form of noise, present in neural  
108 systems, or spontaneous flipping of spins in our model. From the phase diagrams (see Fig. 1 in main text), it is evident that the  
109 animal will spontaneously transition from averaging direction to all available options, to eliminating one among the remaining  
110 options, so long as the brain is poised below a critical level of noise,  $T < T_c$  (Fig. 1, B and E in main text and Fig. S7, A and  
111 C). Here, we will address behavior of the system when  $T > T_c$  for decision-making in both the two- and the three-choice case.  
112 In the two-choice case, the agent consistently moves towards the average of the two target directions. However, any movement  
113 in the direction perpendicular to this can be described by a diffusive process (Fig. S7B). For the three-choice case, we observe  
114 that when  $T$  exceeds  $T_c$ , geometrical relationship between options creates a strong bias towards central targets (Fig. S7D).  
115 This prevents the animal from exploring the different targets (of equal value) with a similar frequency—as indicated by our  
116 experimental data where ratio of visiting a side target to visiting the center target is 0.82 for flies and 1.23 for locusts (this ratio  
117 would be 1 if all targets were visited equally). Thus, in order to maximize decision-accuracy in the presence of an arbitrary  
118 number of targets, biological systems (brains) must be poised below a critical level of neural noise, i.e.  $T$  must be less than  $T_c$ .

119 **1.4.2 Neural tuning.** The bifurcation angle  $\theta_c$  increases monotonically with the neural tuning parameter,  $\nu$  (Fig. S3C). Thus,  
120 increasing  $\nu$  inevitably increases travel distance, and hence, the time to decision. Hence, for decisions where time to decision is  
121 critical, organisms require the spins in the decision-making ensemble to be highly tuned. However, very high directional tuning  
122 (low values of  $\nu$ ) is also detrimental to the animal as this eliminates all options, except one, making the animal less sensitive to  
123 information that may be acquired as the animal approaches the targets. Thus, we expect the extent of neural tuning, together  
124 with neural noise, to represent a trade-off between decision-speed and accuracy.

125 **1.5 Calculating susceptibility.** Susceptibility is a key concept in physics and mathematics, from statistical mechanics to dynamical  
126 systems theory. It quantifies the change of a system’s state in response to change in some external field. The reason physicists  
127 and mathematicians are interested in the quantity is because it exhibits a sharp increase when a complex system approaches a  
128 critical phase transition and is hence, predictive of the system being close to a tipping point (24, 25). For decision-making  
129 systems, susceptibility represents increased sensitivity of the system to small differences between the targets, making a rise  
130 in susceptibility highly desirable. Here, we show that the brain breaks down multi-choice decisions to a series of binary  
131 decisions, each of which is marked by a bifurcation, inevitably causing a peak in susceptibility. We measure susceptibility as  
132 the directional deviation of the agent given one extra spin that fires for one of the targets (making it  $\sim 2\%$  more attractive).  
133 To do this we simulate a decision-making agent that at each timestep, outputs a desired direction of movement (following the  
134 exact procedure described above). Additionally, we introduce a second neural network composed of one extra spin encoding  
135 one of the targets, that at each timestep reaches equilibrium through iterative collective dynamics (here, for 1000 timesteps)  
136 and computes a second desired direction of movement. Susceptibility at the agent’s current location is then measured as the  
137 difference in the agent’s direction of travel output by the two networks (representing sensitivity to the presence of an extra spin  
138 in the second network). As expected, we observe a peak in susceptibility close to the bifurcation point. Quantifying the agent’s  
139 decision accuracy reveals that the system is able to amplify such small differences and the agent almost always chooses the  
140 ‘correct’ target (Fig. S3, D and E).

141 **1.6 Spatial asymmetry in target locations.** In the above model formulation, spins encode target locations, and attractiveness of  
142 a target is encoded in the proportion of spins that point to that target. This formulation fails to encapsulate certain spatial  
143 geometries. For example, when two targets are in directional proximity while a third target is directionally distant from the  
144 agent’s egocentric perspective. Since spins encode directions to targets, and two of the three targets are in directional proximity,  
145 the agent always goes to one of these targets (Fig. S8). Previous work in fruit flies (26), and our experiments with larval  
146 zebrafish (main Fig. 4), suggest that this is not the case and that animals integrate such that directionally-similar targets are  
147 considered as a single unit; that they will still visit an equally attractive, but directionally distant, target. To account for this,  
148 we incorporate an ‘overlap’ function in our model implementation. This function reduces effective size of the decision-making  
149 ensemble by discounting a proportion of spins encoding a target if there are other targets in directional proximity. Biologically,  
150 this can be seen as saturation of neurons that encode that direction. Here, each spin encodes direction to its preferred target  
151 with a Gaussian error,  $\varepsilon_i$  centered around the direction to the target.

$$\varepsilon = \mathcal{N}(0, \sigma_\theta^2) \quad [5]$$

152 where,  $\sigma_\theta^2$  is the variance of the error distribution. Spins are then discounted from network depending on their deviation from  
153 their preferred target relative to their deviation from direction to other targets. Probability that spin  $i$  is still considered, or  
154 probability that it is not discounted  $c_i$  is given by

$$c_i = \frac{f(\theta_{ij})}{\sum_j f(\theta_{ij})} \quad [6]$$

155 where,  $f(\theta_{ij})$  is the probability density at  $\theta_{ij}$  from a normal distribution  $N(0, \sigma_\theta^2)$  and  $\theta_{ij}$  is the deviation in the preferred  
 156 direction of spin  $i$  from the center of target  $j$ . Effectively, a discounted spin in the decision-making ensemble and a spin that  
 157 does not fire i.e.  $\sigma_i = 0$  are treated identically. Fig. S4 shows results from a model with and without implementation of the  
 158 ‘overlap’ function for symmetric setups (an illustration of including gaussian error in the directional vectors), while Fig. S8  
 159 shows these results in an asymmetric setup as discussed above.

160 **1.7 Mean-field approximation.** Here, we present a mean-field approximation of the same neural decision-making model described  
 161 in section 1.2. This model largely draws inspiration from spin models used in physics, primarily to explain magnetism (1, 27).  
 162 As analogy, neural activity here akin to spins in these models, excitatory neural interactions are described as being ferromagnetic  
 163 and inhibitory interactions as antiferromagnetic.

164 In our model the  $N$  spins are divided into  $k$  equal groups  $G_i (i = 1, \dots, k)$ , where  $k$  is the number of options (potential  
 165 targets in space) available to the animal. The fraction of the total number of spins that are active towards  $\hat{p}_i$  is given by

$$n_i = \frac{1}{N} \sum_{j \in G_i} \sigma_j \quad [7]$$

166 Then we can rewrite equation [4] in the following way

$$\vec{V} = v_0 \sum_{i=1}^k \hat{p}_i n_i \quad [8]$$

167 The rule by which a spin switches its state from inactive ( $\sigma_i = 0$ ) to active ( $\sigma_i = 1$ ) is constructed such that the spin is  
 168 more likely to be active if the animal is already moving in that direction. This can be expressed by Glauber dynamics (28).

$$r_{1 \rightarrow 0}^{(i)} = \frac{r_0}{1 + \exp\left(\frac{2k\vec{V} \cdot \hat{p}_i}{T}\right)} \quad r_{0 \rightarrow 1}^{(i)} = \frac{r_0}{1 + \exp\left(-\frac{2k\vec{V} \cdot \hat{p}_i}{T}\right)} \quad [9]$$

169 where  $r_{1 \rightarrow 0}^{(i)}$  is the rate in which a spin in group  $G_i$  changes from “active” state to “inactive” and  $r_{0 \rightarrow 1}^{(i)}$  is the rate of the opposite  
 170 transition, from “inactive” to “active”.  $r_0$  is a constant rate which we set to one. The model also includes noise in the neural  
 171 system i.e. the rate at which spins will switch states spontaneously independent of the collective dynamics involved. This is  
 172 analogous to the temperature parameter that introduces randomness in the spin-flipping dynamics. Then the equations of  
 173 motion (master equation) in the limit of  $N \gg 1$  are

$$\frac{dn_i}{dt} = \frac{\frac{1}{k} - n_i}{1 + \exp\left(-\frac{2k\vec{V} \cdot \hat{p}_i}{T}\right)} - \frac{n_i}{1 + \exp\left(\frac{2k\vec{V} \cdot \hat{p}_i}{T}\right)} \quad [10]$$

174 We rearrange the above equation [10] to get

$$\frac{dn_i}{dt} = \frac{1}{k \left(1 + \exp\left(-\frac{2k\vec{V} \cdot \hat{p}_i}{T}\right)\right)} - n_i \quad [11]$$

175 The steady state solution of this equation can be written as the solution of the following system of algebraic equations

$$n_i = \frac{1}{k \left( 1 + \exp \left( -\frac{2k\vec{V} \cdot \hat{p}_i}{T} \right) \right)} \quad i = 1, 2, \dots, k \quad [12]$$

176 The system of equations that including  $k$  equations [12] and the 2 equations [8] in 2D is our basic system that gives us as its  
 177 solution the velocity  $\vec{V}$  and the fraction of active spins in each group  $n_i$  at steady state. We will henceforth refer to this system  
 178 as the “model equations”.

179 When the targets are at infinity, the angles between the targets are constant, and the Hamiltonian is time-independent and  
 180 describes a system in equilibrium. We now examine the simplest case of two targets at infinity, i.e. where  $k = 2$  and  $\hat{p}_1$  and  $\hat{p}_2$   
 181 are fixed. In this case, there exists a symmetric solution that describes a compromise between the two targets.

$$\vec{V} = V \left( \frac{\hat{p}_1 + \hat{p}_2}{2} \right) \quad [13]$$

182 Substituting equation [10] into equation [8] gives the following algebraic equation:

$$V = \frac{1}{1 + \exp \left( -\frac{2V(1+\cos\theta)}{T} \right)} \quad [14]$$

183 which always has a solution for ( $0 < \theta < \pi$ ;  $0 < T < 1$ ). In the three-choice case ( $k = 3$ ), we get a similar compromise solution  
 184 when the targets are radially symmetric,  $\hat{p}_1 \cdot \hat{p}_2 = \hat{p}_3 \cdot \hat{p}_3$ .

185 When the angle is large enough ( $\theta > \theta_c$ ) and the temperature is low enough ( $T < T_c$ ), there exists a second non-symmetric  
 186 solution to the model equations that we term “decision” as it describes breaking the compromise between the targets and  
 187 change in the direction of movement. The curve in the phase diagram where the second solution appears is called “binodal  
 188 curve” or “coexistence curve” (represented by the dashed line; see Fig. 1B and E in main text). For larger angles, the symmetric  
 189 solution becomes unstable. In the phase diagram this instability happens at the “spinodal curve” (represented by the solid line;  
 190 see Fig. 1B and E in main text). Between the two curves we have the metastable region where both the compromise and  
 191 decision are possible, and we expect a transition between them in a form of a bifurcation of the compromise solution. This is a  
 192 typical hysteresis region of first order phase transition that at higher temperatures becomes second order. The transition to a  
 193 second order phase transition happens at the tri-critical point where the coexistence and spinodal curves coincide into the  
 194 second order phase transition curve (above the tri-critical point). In the case of three targets, we have at the first bifurcation  
 195 point a phase transition between two different compromise solutions—for small angles we have a compromise between all three  
 196 directions to the targets while for large angles we have a compromise between two of the three targets. Thus, the symmetry is  
 197 broken sequentially.

198 Let us now find the criterion for instability of a general solution of the model equations. The dynamical equation for the  
 199 velocity can be obtained using equations [8] and [11].

$$\frac{d\vec{V}}{dt} = \sum_{i=1}^k \frac{dn_i}{dt} \hat{p}_i = \sum_{i=1}^k \frac{1}{k \left( 1 + \exp \left( -\frac{2k\vec{V} \cdot \hat{p}_i}{T} \right) \right)} \hat{p}_i - \vec{V} \quad [15]$$

200 Let  $\vec{V} = \vec{V}_0$  be a solution of the model equations and consider a small perturbation to the velocity in the perpendicular  
 201 direction to the velocity  $\vec{V}_0$ .

$$\vec{V} = \vec{V}_0 + \epsilon \hat{n}^0 \quad [16]$$

202 where,  $\hat{n}^0$  is the normal to  $\vec{V}_0$ . Substituting into equation [15], expanding to first order in  $\epsilon$  and taking the normal component,  
 203 we get the following equation for the perturbation  $\epsilon$ .

$$\frac{d\epsilon}{dt} = -A\epsilon + \mathcal{O}(\epsilon^2) \quad [17]$$

where

$$A \equiv 1 - \frac{1}{2T} \sum_{i=1}^k \operatorname{sech}^2 \left( \frac{k\vec{V}_0 \cdot \hat{p}_i}{T} \right) (\hat{n}^0 \cdot \hat{p}_i)^2 \quad [18]$$

Therefore, the solution  $\vec{V} = \vec{V}_0$  is stable if  $A > 0$  and unstable if  $A < 0$ . Hence, the curve  $A = 0$  for the compromise solution is the spinodal curve.

**1.7.1 Susceptibility.** Susceptibility is defined as the response of the order parameter of a system to an external field (29). In this model, a bias towards one of the targets is equivalent to application of an external field in models of spin interactions (1). The order parameter in our model is the velocity component normal to the individual's previous direction of movement. Here, we examine its response to introduction of a small imbalance in the normal direction. Let us denote a small asymmetry in one of the neural groups as  $\alpha$ . Without loss of generality we take the first neural group  $G_1$  (assuming  $\hat{n}^0 \cdot \hat{p}_i \neq 0$ ). Then the velocity can be written as

$$\vec{V} = \sum_{i=1}^k \frac{1}{k \left( 1 + \exp \left( -\frac{2k\vec{V} \cdot \hat{p}_i}{T} \right) \right)} \hat{p}_i + \alpha \hat{p}_1 \quad [19]$$

When we decompose the velocity to the initial velocity and the small perturbation  $v_n$  in the normal direction  $\hat{n}^0$

$$\vec{V} = \vec{V}_0 + v_n \hat{n}^0 \quad [20]$$

in which case, the susceptibility  $\chi$  (at constant temperature) is given by

$$\chi = \left. \frac{d(\vec{V} \cdot \hat{n}^0)}{d\alpha} \right|_{v_n=0, T=\text{const.}} \quad [21]$$

We substitute the decomposition equation [20] into the normal component of equation [19].

$$\vec{V} \cdot \hat{n}^0 = \frac{1}{k} \sum_{i=1}^k \frac{1}{1 + \exp \left( \frac{-2k\vec{V}_0 \cdot \hat{p}_i - 2kv_n(\hat{p}_i \cdot \hat{n}^0)}{T} \right)} \hat{p}_i \cdot \hat{n}^0 + \alpha \hat{p}_1 \cdot \hat{n}^0 \quad [22]$$

Taking the derivative at  $v_n = 0$  yields

$$d(\vec{V} \cdot \hat{n}^0) = \frac{1}{2T} \sum_{i=1}^k \operatorname{sech}^2 \left( \frac{k\vec{V}_0 \cdot \hat{p}_i}{T} \right) (\hat{n}^0 \cdot \hat{p}_i)^2 dv_n + (\hat{p}_1 \cdot \hat{n}^0) d\alpha \quad [23]$$

Using the definition from equation [18] and the fact that  $d(\vec{V} \cdot \hat{n}^0) = dv_n$ , we can write the susceptibility as

$$\chi = \frac{\hat{p}_1 \cdot \hat{n}^0}{A} \quad [24]$$

217 Thus, susceptibility diverges when  $A \rightarrow 0$ , i.e. on the spinodal curve (see Fig. S5). Based on this analysis, we arrive at  
 218 the conclusion that maximal susceptibility is obtained when the bifurcation occurs at the highest possible angle—as late as  
 219 possible from the perspective of an animal approaching the different spatial targets.

220 **1.7.2 Short-time response function.** Let us consider that our system of  $N$  spins is in the averaging/compromise regime. Since the  
 221 order parameter of the system is the velocity component in the direction normal to the movement direction, we will denote it  
 222 by  $V_n$ , so that a change in the direction of the movement will be a result of  $V_n \neq 0$ . At  $t = 0$ , we add a single spin that encodes  
 223 direction to one of the targets, say  $\hat{p}_1$ . The short time response of the system is defined here as the response of the system as  
 224 manifested in a change of the order parameter  $V_n$  in a very short time, so short that it allows for only one spin to switch states.  
 225 In other words we are looking for a change  $\delta V_n$  over the firing time of a single spin  $\delta t$  as a result of bias introduced by the  
 226 additional spin. In doing this, we generalize a similar calculation that appeared for a one dimensional spin model in (27).

227 From equation [8], we see that the change in state of a single spin that encodes target  $i$  (pointing towards  $\hat{p}_i$  direction)  
 228 makes the following change in the normal component of the velocity vector.

$$\Delta V_n = \frac{\hat{p}_i \cdot \hat{n}}{N} \quad [25]$$

229 First, we consider a simple limit  $T \rightarrow \infty$  where there is no response. The probability of a spin in the group  $i$  to be in the  
 230 active state ( $\sigma_i = 1$ ) is given by

$$P = \frac{r_{0 \rightarrow 1}^{(i)}}{r_{0 \rightarrow 1}^{(i)} + r_{1 \rightarrow 0}^{(i)}} = \frac{1}{1 + \exp\left(-\frac{2k\vec{V} \cdot \hat{p}_i}{T}\right)} \quad [26]$$

231 which in the limit  $T \rightarrow \infty$  gives 1/2. We add a single spin that encodes direction to the target pointing towards  $\hat{p}_1$ . Therefore  
 232 it contributes to  $V_n$  according to equation [25]. In order to find the contribution of the rest of the spins in the decision-making  
 233 ensemble, we have to multiply the probability that each spin is active (which is 1/2 without response) by the number of spins  
 234 in the group and the contribution of one active spin according to equation [25]. We therefore get

$$V_n = \sum_{i=1}^k \frac{1}{2} \cdot \frac{N}{k} \cdot \frac{\hat{p}_i \cdot \hat{n}}{N} + \frac{\hat{p}_1 \cdot \hat{n}}{N} = \frac{1}{2k} \sum_{i=1}^k (\hat{p}_i \cdot \hat{n}) + \frac{1}{N} (\hat{p}_1 \cdot \hat{n}) \quad [27]$$

235 When the targets are symmetric with respect to the direction of movement, the first term in equation [27] vanishes, and we  
 236 get

$$V_n = \frac{\sin(\frac{\theta}{2})}{N} \quad [28]$$

237 where  $\theta$  is the angle between the targets in the case of two targets, and the angle between the leftmost and the rightmost  
 238 targets in the case of three targets.

239 Now let us return to the response of a single spin over time  $\delta t$ . At  $t = 0$ , we introduced an additional spin that encodes  
 240 direction  $\hat{p}_1$ . Prior to any response, equation [27] gives the expression for  $V_n$ . We can write the contributions of the change in  
 241 state of all spins in the ensemble in the following way which gives us the response of the system.

$$\delta V_n = \frac{1}{2} \cdot \frac{N}{k} \sum_{i=1}^k r_{0 \rightarrow 1}^{(i)} \frac{\hat{p}_i \cdot \hat{n}}{N} \delta t - \frac{1}{2} \cdot \frac{N}{k} \sum_{i=1}^k r_{1 \rightarrow 0}^{(i)} \frac{\hat{p}_i \cdot \hat{n}}{N} \delta t + \frac{\hat{p}_1 \cdot \hat{n}}{N} \delta t \quad [29]$$

242 Substituting the rates from equations [9], we get



$$\delta V_n = \sum_{i=1}^k \frac{\hat{p}_i \cdot \hat{n}}{2k} \tanh \left( \frac{k \vec{V}(0) \cdot \hat{p}_i}{T} \right) \delta t + \frac{\hat{p}_1 \cdot \hat{n}}{N} \delta t \quad [30]$$

243 Let us assume that we start from the symmetric compromise solution for  $t < 0$ , so that  $V_n = 0$ , and thus at  $t = 0$ ,  $V_n$  is  
 244 still small. Then we can look at it as a small perturbation of  $\vec{V}(0)$  according to equation [19], and obtain to first order in the  
 245 perturbation  $v_n$

$$\frac{\delta V_n}{\delta t} = \sum_{i=1}^k \frac{\hat{p}_i \cdot \hat{n}_0}{2k} \tanh \left( \frac{k \vec{V}_0 \cdot \hat{p}_i}{T} \right) + v_n(1 - A) + \frac{\hat{p}_1 \cdot \hat{n}_0}{N} \quad [31]$$

246 where  $A$  is given in equation [18]. Since  $A \geq 0$  for stable solutions, from the structure of the equation [31] we see that the  
 247 response is maximal when  $A = 0$ , namely at the spinodal on the verge of instability (see Fig. S5).

248 Since there is no response yet at  $t = 0$ , we can substitute for  $v_n$  the expression from equation [27]. Then for two and for  
 249 three symmetric targets, we get

$$\frac{\delta V_n}{\delta t} = \frac{\sin \frac{\theta}{2}}{N} \left[ 1 + \frac{\sin^2 \frac{\theta}{2}}{2T} \operatorname{sech}^2 \left( \frac{2V_0 \cos \frac{\theta}{2}}{T} \right) \right] \quad [32]$$

and

$$\frac{\delta V_n}{\delta t} = \frac{\sin \frac{\theta}{2}}{N} \left[ 1 + \frac{\sin^2 \frac{\theta}{2}}{T} \operatorname{sech}^2 \left( \frac{3V_0 \cos \frac{\theta}{2}}{T} \right) \right] \quad [33]$$

respectively.

250 Now let us look at response due to the same bias that is introduced at  $t = 0$ , but  $V_n(t < 0) \neq 0$  as it is essential in order to  
 251 calculate the response function after the first bifurcation. In this case,  $V_n$  is not small and there is a response for  $t < 0$ . We  
 252 can add the additional spin that encodes direction  $\hat{p}_1$  in the following way

$$\vec{V}(t = 0) = \vec{V}(t < 0) + \frac{\hat{p}_1 \cdot \hat{n}}{N} \hat{n} \quad [34]$$

253 where we denote  $\vec{V}(t < 0) = \vec{V}_0$ . We can write the response to this additional spin at  $t = 0$  over the very short time  $\delta t$  in the  
 254 following schematic form

$$\delta V_n = \sum_{i=1}^k \frac{\hat{p}_i \cdot \hat{n}}{N} (P_{i,0 \rightarrow 1}^{(1)} - P_{i,1 \rightarrow 0}^{(1)}) \delta t + \frac{\hat{p}_1 \cdot \hat{n}}{N} \delta t \quad [35]$$

255 where  $P_{i,0 \rightarrow 1}^{(1)}$  is the firing probability of an inactive spin in group  $G_i$  as a response to bias introduced by the additional spin that  
 256 encodes direction  $\hat{p}_1$ , and  $P_{i,1 \rightarrow 0}^{(1)}$  is the probability that an active spin in group  $G_i$  turns off as a response to bias introduced by  
 257 the additional spin.

$$\begin{aligned}
P_{i,0 \rightarrow 1}^{(1)} &= \frac{N}{k} r_{1 \rightarrow 0}^{(i)}(t < 0) r_{0 \rightarrow 1}^{(i)}(t = 0) \\
P_{i,1 \rightarrow 0}^{(1)} &= \frac{N}{k} r_{0 \rightarrow 1}^{(i)}(t < 0) r_{1 \rightarrow 0}^{(i)}(t = 0)
\end{aligned} \tag{36}$$

where

$N/k$  is the number of spins in group  $i$ ,

$P_{1 \rightarrow 0}^{(i)}(t < 0) = \frac{1}{1 + \exp\left(\frac{2k\vec{V}_0 \cdot \hat{p}_i}{T}\right)}$  is the probability of having an inactive spin at  $t < 0$  in group  $G_i$ ,

$P_{0 \rightarrow 1}^{(i)}(t < 0) = \frac{1}{1 + \exp\left(-\frac{2k\vec{V}_0 \cdot \hat{p}_i}{T}\right)}$  is the probability of having an active spin at  $t < 0$  in group  $G_i$ ,

$P_{1 \rightarrow 0}^{(i)}(t = 0) = \frac{1}{1 + \exp\left(\frac{2k\vec{V}(t=0) \cdot \hat{p}_i}{T}\right)}$  is the probability of a spin to become inactive at  $t = 0$  in group  $G_i$ ,

$P_{0 \rightarrow 1}^{(i)}(t = 0) = \frac{1}{1 + \exp\left(-\frac{2k\vec{V}(t=0) \cdot \hat{p}_i}{T}\right)}$  is the probability of a spin to become active at  $t = 0$  in group  $G_i$ ,

$P_{1 \rightarrow 0}^{(i)}(t < 0) r_{0 \rightarrow 1}^{(i)}(t = 0)$  is the probability of having an inactive spin at  $t < 0$  in group  $G_i$ , that becomes active at  $t = 0$ ,

$P_{0 \rightarrow 1}^{(i)}(t < 0) r_{1 \rightarrow 0}^{(i)}(t = 0)$  is the probability of having an active spin at  $t < 0$  in group  $G_i$ , that becomes inactive at  $t = 0$ .

258 Substituting equation [34] into equation [35] and taking the limit of large  $N(N \gg k)$ , we get

$$\begin{aligned}
\delta V_n &= \sum_{i=1}^k \frac{\hat{p}_i \cdot \hat{n}}{N} \cdot \frac{N}{4k} \operatorname{sech}^2\left(\frac{k\vec{V}_0 \cdot \hat{p}_i}{T}\right) \left[ 1 + \frac{2k(\hat{p}_1 \cdot \hat{n})(\hat{p}_i \cdot \hat{n})}{NT \left(1 + \exp\left(\frac{2k\vec{V}_0 \cdot \hat{p}_i}{T}\right)\right)} \right] \delta t \\
&\quad - \frac{\hat{p}_i \cdot \hat{n}}{N} \cdot \frac{N}{4k} \operatorname{sech}^2\left(\frac{k\vec{V}_0 \cdot \hat{p}_i}{T}\right) \left[ 1 - \frac{2k \exp\left(\frac{2k\vec{V}_0 \cdot \hat{p}_i}{T}\right) (\hat{p}_1 \cdot \hat{n})(\hat{p}_i \cdot \hat{n})}{NT \left(1 + \exp\left(\frac{2k\vec{V}_0 \cdot \hat{p}_i}{T}\right)\right)} \right] \delta t + \frac{\hat{p}_1 \cdot \hat{n}}{N} \delta t \\
&= \frac{\hat{p}_1 \cdot \hat{n}}{N} (2 - A) \delta t
\end{aligned} \tag{37}$$

where  $A$  is given by equation [18]. Also in this case we see that the response is maximal when  $A = 0$ , namely at the spinodal on the verge of instability (see Fig. S5).

259 **1.7.3 Trajectories.** We use the same model equations for a time-dependent Hamiltonian form [1] and consider them at every  
260 position to calculate trajectories for a system with targets at a finite distance (see Fig. S5 for trajectories obtained from the  
261 mean-field approximation and Fig. S6 for comparison with simulations of smaller system sizes).

262 All results of this section can be generalized to any value of the neural tuning parameter by replacing the cosines of the  
263 scalar products between the directions  $\hat{p}_i$  by the expression given in equation [2].

264 **1.8 Embedding the neural model in the ring-attractor class of models.** Much work in neuroscience has considered ring-attractor  
265 models as being of considerable importance to understanding spatial navigation (4, 5, 16, 30–32). Neural ring-attractor models  
266 (4, 31) are motivated by head-direction cells found in the brain of both vertebrates (23, 33) and invertebrates (16, 30). They  
267 are known to underlie the representation of instantaneous heading direction of an animal in the horizontal plane regardless of  
268 its location and ongoing behavior (34). When animals are exposed to a prominent landmark, an activity bump appears on a  
269 specified sector of the ring, and rotates concurrently with the landmark as the animal turns towards it (30). Upon introduction  
270 of a second landmark, this activity bump was found to either ‘flow’ or ‘jump’ to, and stabilize at, a new location. The exact  
271 nature of the bump shift (‘flow’ or ‘jump’) was found to be dependent on the angular distance of the new landmark from the  
272 older one (16). All these dynamics are captured by neural ring-attractor models. We follow the general structure of the neural  
273 ring-attractor models presented for example in (5) and (32).

274 In the ring-attractor model, neural firing rate is described in a continuous formulation by a single scalar function  $m(\theta, t)$   
275 which is a function of the preferred angle  $\theta$  and time  $t$ . The model is essentially one-dimensional with ring topology, and the  
276 distribution of the preferred directions is treated as continuous and uniform. The ring is defined by the preferred directions and  
277 thus proximity of neurons in the ring does not imply physical proximity in the brain, although we note that in some insects,  
278 directions are topologically organised (16, 30). The interactions in the network are such that an activity bump is created and  
279 maintained by excitation among neurons that encode a similar direction, along with global inhibition or inhibition among  
280 neurons that encode conflicting directions (35). Since our model inherently includes excitation when the spins encode a similar

281 direction and inhibition in different directions, it becomes natural to identify the (average) firing rate with the fraction of  
 282 active spins in the mean field limit, and below we show that our model is within the class of neural ring-attractor models.

283 The dynamics of the firing rate is expressed schematically by the following equation

$$\tau \frac{\partial m(\theta, t)}{\partial t} = -m(\theta, t) + g(I(\theta, t) + X(\theta, t)) \quad [38]$$

284 where  $g$  is a non-linear function which describes the gain of a spin from the input which can further be split into interactions  
 285 with rest of the network  $I(\theta, t)$  and external input  $X(\theta, t)$  and  $\tau$  is a time constant that sets the time scale of the dynamics of  
 286 the system (32). The gain function  $g$  is usually taken to be Heaviside step function (5, 32).

287 Interactions with the rest of the network are usually given as a convolution of the following form

$$I(\theta, t) = \frac{1}{\pi} \int d\theta' J(\theta - \theta') p(\theta', t) m(\theta', t) \quad [39]$$

288 where the function  $J$  describes the relative weights of the neurons in the network. It commonly takes the form of a Ricker  
 289 wavelet, also known as a Mexican Hat function, which has an excitatory center and an inhibitory surround, usually depend  
 290 only on the difference in orientation.  $p(\theta, t)$  denotes the release probability of a neuron which represents the efficiency of the  
 291 neural interactions.

292 Below, we illustrate how our neural model suggests a mixture between the two input terms (the interactions and the external  
 293 input). Since the gain function acts on both, there is no concrete linearity that should be preserved. Mathematical formulations  
 294 of the ring-attractor network sometimes include a stochastic function in the form of a  $\theta$ -dependent Wiener process. This is  
 295 added to [38] to represent external noise (36). The neural model gives a natural way to extend this model to include noise  
 296 presented in our model as the neural noise parameter  $T$ .

297 Let us consider  $N$  spins at each point of the ring. In this regard we take a continuous limit of the neural model, and in the  
 298 end we consider the mean field limit, which means in particular taking  $N \gg 1$ .

$$H = -\frac{J}{2N} \int d\theta' \int d\theta \sum_{i=1}^N \sum_{j=1}^N \sigma_i(\theta, t) \sigma_j(\theta', t) \hat{p}_i \cdot \hat{p}_j + \eta \int d\theta \sum_{i=1}^N \sigma_i(\theta, t) - \eta \sum_{l=1}^k \int d\theta \sum_{i=1}^N \delta(\theta - \bar{\theta}_l) \sigma_i(\theta, t) \quad [40]$$

299  $J$  is the interaction strength which is assumed to be equal for all spins in all to all interactions. The interactions here (first  
 300 term in [40]) are considered to be as the regular scalar products between different directions ( $\hat{p}_i(\theta, t) \cdot \hat{p}_j(\theta', t)$ ) which can be  
 301 modified according to equation [2] to include the neural tuning parameter  $\nu$ . The parameter  $\eta$  represents global inhibition  
 302 (second term in [3]) that takes effect at any angle  $\theta$  and it is large enough to prevent the spins from changing their state from 0  
 303 to 1 ( $\eta N \gg J$ ), unless an external stimuli induces an effective external field that cancels out the effect of the global inhibition  
 304 at those angles (third term in [40]). See (37) for a similar construction with inhibition and induced external field for a neural  
 305 network. The stimuli represent the targets that positioned at the angles  $\bar{\theta}_l(t)$ . We assume that they induce a very narrow  
 306 distribution of external field centered at  $\theta = \bar{\theta}_l$  ( $l = 1, \dots, k$ ), that we write them here with delta functions.

307 In order to obtain the free energy in the mean field limit we can rewrite the Hamiltonian in the following way

$$H = -\frac{J}{2N} \int d\theta' \int d\theta \left( \sum_{i=1}^N \sigma_i(\theta, t) \hat{p}_i \right) \cdot \left( \sum_{j=1}^N \sigma_j(\theta', t) \hat{p}_j \right) + \eta \int d\theta \sum_{i=1}^N \sigma_i(\theta, t) - \eta \sum_{l=1}^k \int d\theta \sum_{i=1}^N \delta(\theta - \bar{\theta}_l) \sigma_i(\theta, t) \quad [41]$$

308 We are following here the procedure that was used for the one dimensional Curie-Weiss model (see (38), chapter 13) and  
 309 was applied in the context of a similar spin model Hamiltonian in (1) for the case of two targets. The partition function for the  
 310 Hamiltonian is

$$Z = \text{tr}_{\{\sigma_i\}} \exp\left(-\frac{H}{T}\right) \quad [42]$$

311 Since the system is two-dimensional, let us introduce two auxiliary fields  $\vec{V} \equiv (V_x, V_y)$  and using the Gaussian identity

$$e^{\frac{a^2+b^2}{4c}} = \frac{c}{\pi} \int_{-\infty}^{\infty} dV_x dV_y e^{-c(V_x^2+V_y^2)+aV_x+bV_y} \quad [43]$$

312 where we take

$$\begin{aligned} a &= \frac{2J^{\frac{1}{2}}}{T} \int d\theta \sum_{i=1}^N \sigma_i(\theta, t) \cos \theta, \\ b &= \frac{2J^{\frac{1}{2}}}{T} \int d\theta \sum_{i=1}^N \sigma_i(\theta, t) \sin \theta, \\ c &= \frac{N}{T} \end{aligned} \quad [44]$$

313 We can write the partition function in a form which is linear in  $\sigma_i$

$$Z = \frac{N}{\pi T} \text{tr}_{\{\sigma_i\}} \int_{-\infty}^{\infty} dV_x dV_y \exp \left( -\frac{N\vec{V}^2}{T} + \frac{1}{T} \int d\theta \left( 2J^{\frac{1}{2}} \sum_{i=1}^N \sigma_i \widehat{p}_i(\theta) \cdot \vec{V} - \eta \left( 1 - \sum_{l=1}^k \delta(\theta - \bar{\theta}_l) \right) \sum_{i=1}^N \sigma_i \right) \right) \quad [45]$$

314 In the limit of large  $N$  the partition function is dominated by

$$\vec{V} = J^{\frac{1}{2}} \int d\theta n(\theta) \widehat{p}(\theta) \quad [46]$$

315 where  $n(\theta)$  is the fraction of active spins defined by  $n(\theta) \equiv \frac{1}{N} \sum_{i=1}^N \sigma_i(\theta)$ . Summing over the possible states of the spins we get

$$\begin{aligned} Z &= \frac{N}{\pi T} \int_{-\infty}^{\infty} dV_x dV_y e^{-\frac{N\vec{V}^2}{T}} \int \mathcal{D}\theta \prod_{i=1}^N \sum_{\sigma=0,1} \exp \left( \frac{1}{T} \left[ 2J^{\frac{1}{2}} \vec{V} \cdot \widehat{p}_i(\theta) - \eta \left( 1 - \sum_{l=1}^k \delta(\theta - \bar{\theta}_l) \right) \right] \sigma \right) \\ &= \frac{N}{\pi T} \int_{-\infty}^{\infty} dV_x dV_y e^{-\frac{N\vec{V}^2}{T}} e^{N \sum_{\theta} \ln \left( 1 + \exp \left[ \frac{1}{T} \left( 2J^{\frac{1}{2}} \vec{V} \cdot \widehat{p}(\theta) - \eta \left[ 1 - \sum_{l=1}^k \delta_{\theta \bar{\theta}_l} \right] \right) \right] \right)} \end{aligned} \quad [47]$$

316 where  $\mathcal{D}\theta \equiv \prod_{\alpha} d\theta_{\alpha}$  over all angles.

317 Then we can read the free energy per spin  $F(\vec{V}, T)$  from the general form

$$Z \sim \int_{-\infty}^{\infty} dV_x dV_y \exp \left( -\frac{N}{T} F(\vec{V}, T) \right) \quad [48]$$

318 to be

$$F(\vec{V}, T) = \vec{V}^2 - T \sum_{\theta} \ln \left( 1 + \exp \left[ \frac{1}{T} \left( 2J^{\frac{1}{2}} \vec{V} \cdot \widehat{p}(\theta) - \eta \left[ 1 - \sum_{l=1}^k \delta_{\theta \bar{\theta}_l} \right] \right) \right] \right) \quad [49]$$

319 The effective result of this construction is that at each value of  $\theta$  along the ring we obtain a separate contribution to the  
320 equation of motion in the mean field approximation. From the equations of motion  $\frac{\partial F}{\partial \vec{V}} = 0$  we get the steady state solution

$$\vec{V} = \sum_{\theta} \frac{J^{\frac{1}{2}} \hat{p}(\theta)}{1 + \exp\left(-\frac{1}{T} \left[ 2J^{\frac{1}{2}} \vec{V} \cdot \hat{p}(\theta) - \eta \left(1 - \sum_{l=1}^k \delta_{\theta \bar{\theta}_l}\right) \right]\right)} \quad [50]$$

and according to equation [46] we identify the fraction of active spins at steady state to be

$$n(\theta, t) = \frac{1}{1 + \exp\left(-\frac{1}{T} \left[ 2J \int d\theta' n(\theta', t) \hat{p}(\theta', t) \cdot \hat{p}(\theta, t) - \eta \left(1 - \sum_{l=1}^k \delta_{\theta \bar{\theta}_l}\right) \right]\right)} \quad [51]$$

We see here that indeed if the global inhibition is high,  $n(\theta, t) \rightarrow 0$ , except for  $\theta = \bar{\theta}_l$  ( $l = 1, \dots, k$ ). The corresponding dynamical equation in analogy with equation [11] is

$$\frac{\partial n(\theta, t)}{\partial t} = \frac{1}{1 + \exp\left(-\frac{1}{T} \left[ 2J \int d\theta' n(\theta', t) \hat{p}(\theta', t) \cdot \hat{p}(\theta, t) - \eta \left(1 - \sum_{l=1}^k \delta_{\theta \bar{\theta}_l}\right) \right]\right)} - n(\theta, t) \quad [52]$$

and the resemblance in structure to equation [38] leads us to the identification of the fraction of active spins  $n(\theta, t)$  with the firing rate in the ring model. Thus, our model is within the class of neural ring-attractor models. However, it has the advantage of being simple and analytically tractable. Furthermore, much experience that comes from analyzing such spin systems has lead to their wide adoption in neuroscience (20, 22, 39).

## 2. Collective decision-making model for animal groups

**2.1 Overview.** The bifurcation pattern described above for binary decision-making is reminiscent of work on collective decision-making in bird flocks (40), fish schools (41) and baboon troops (42). We expose an established model of consensus decision-making in animal groups (43) to a multi-choice decision scenario. In the absence of any feedback mechanism, we find that this model will fail to produce the bifurcation patterns observed in our data. However, previous work has shown that uninformed individuals (those without a desired direction of travel), to some degree, are able to provide this feedback, at least when the group is deciding between two options (43)). However, because the uninformed individuals are recruitable by informed individuals with different desired directions of travel, they primarily function to keep the group together, and fail to provide the necessary feedback in the three-choice context (Fig. S19). Thus, the group will almost always approach the central target. By introducing feedback on individual goal-orientedness as a function of their experienced travel direction, we are able to produce all bifurcation patterns observed in our experimental system, in the presence of two, and three, options. With these feedback mechanisms in place, the model predicts that animal groups, like the brain, will break multi-choice decisions to a series of binary decisions (see Fig. 5 in main text). Thus, our results may be broadly applicable across scales of biological organization—neural ensembles and animal collectives. At both these scales, decision-making can be conceived as a consensus paradigm among elements that compose the system—consensus among neurons at the individual level and among individuals at the group level.

**2.2 Framework.** Groups are composed of  $N$  individuals, each characterised by a position vector  $c_i(t)$  and unit direction vector  $\hat{v}_i(t)$  where  $i$  is the individual identity and  $t$  is the current time step. Individuals modify their own motion by responding to neighbours within a certain distance from them. They turn away from  $n_r$  neighbours encountered within a small repulsion zone of radius  $r_r$ . This represents collision avoidance and maintenance of personal space, and as is apparent in real animal groups, takes highest priority.

$$\vec{d}_i(t + \Delta t) = - \sum_{j=1, j \neq i}^{n_r} \frac{c_j(t) - c_i(t)}{|c_j(t) - c_i(t)|} \quad [53]$$

where  $d_i(t + \Delta t)$  represents the individual's desired direction of travel in response to conspecifics. If no neighbor is present in this zone, the focal individual is attracted to and aligns with  $n_a$  neighbours within a larger interaction zone of radius  $r_a$ .

$$\vec{d}_i(t + \Delta t) = \sum_{j=1, j \neq i}^{n_a} \frac{c_j(t) - c_i(t)}{|c_j(t) - c_i(t)|} + \sum_{j=1}^{n_a} \frac{v_j(t)}{|v_j(t)|} \quad [54]$$

Here,  $d_i(t + \Delta t)$  is subsequently converted to the corresponding unit vector  $\hat{d}_i(t + \Delta t) = d_i(t + \Delta t)/|d_i(t + \Delta t)|$ . To incorporate target preferences, individuals are given information about a preferred direction. Each individual is attributed a goal vector  $g_i(t)$  that points to one of the targets amongst which the group must choose. For sake of simplicity, we assume all individuals have a preferred target, and that the number of individuals with preference for a given target is the same as the number of individuals with preference for any other target. Individuals balance this personal preference with social interactions using a weighting term  $\omega$  to give their desired direction of travel.

$$\vec{d}_i'(t + \Delta t) = \frac{\hat{d}_i(t + \Delta t) + \omega g_i(t)}{|\hat{d}_i(t + \Delta t) + \omega g_i(t)|} \quad [55]$$

Motion of all individuals is subject to noise (error in movement and/or sensory integration) which is implemented by rotating  $\vec{d}_i'(t + \Delta t)$  by a random angle chosen from a circularly wrapped Gaussian distribution centered at 0 and of standard deviation  $\sigma_e$ . Once the desired direction is determined, individuals turn towards  $\vec{d}_i'(t + \Delta t)$  with a maximum turning rate of  $\psi\Delta t$ .

As in (43), we implement feedback on  $\omega$ . At each timestep, if individuals find themselves moving in the direction of their preferred motion (here, within  $20^\circ$  of their preferred direction),  $\omega$  is reinforced by a small value  $\omega_{inc}$  until it reaches a maximum value  $\omega_{max}$ . Otherwise, it is reduced by  $\omega_{dec}$  until it reaches 0. Since the group stays together, group movement towards a given option activates individuals with similar directional preferences by increasing their  $\omega$  while inhibiting individuals with opposing directional preferences by decreasing their  $\omega$ .

We also perform simulations without feedback on  $\omega$  to emphasise that this is an essential feature for the model to produce bifurcations based on egocentric geometry of the presented options (Fig. S19). Without the feedback, the model predicts that animal groups will rarely leave the averaging regime and that groups tend to split. For the three-choice case, in the few cases where the group does not split, it approaches the middle target (Fig. S19).

**2.3 Simulations.** We simulated a group of sixty agents exposed to two or three targets in their environment. Individuals were initialized in proximity to (0, 0) with random positions and directions. For the two-choice case, targets were positioned at a distance of 5 units and  $60^\circ$  apart from the group’s perspective (corresponding to target locations in the neural model, and the fly experiments). This places the two targets at locations (4.33, -2.5) and (4.33, 2.5) respectively. For three targets, distance was still maintained at 5 units but successive targets were now placed  $40^\circ$  apart. The targets were now located at (3.83, -3.21), (5, 0) and (3.83, 3.21). All individuals were assigned a preferred target randomly such that each target had equal number of individuals whose goal vector pointed to it. We ran simulations with and without feedback on the  $\omega$  term to show that this feature is essential to produce such patterns (Fig. S19). We ran 500 replicate simulations for each condition and each replicate run was considered successful when the group reached a given target without splitting. In order to minimize group splits, these simulations were run with 12 informed individuals having preference each target. The remaining individuals (36 and 24 individuals for the two- and three-choice simulations respectively) were considered ‘uninformed’ and exhibited no preference to any target.

### 3. Experiments with fruit flies (*Drosophila melanogaster*)

**3.1 Fly preparation.** All experiments were conducted on 3- to 5-day old female wild-type CS strain *Drosophila melanogaster* raised at  $26^\circ\text{C}$  on a 12 hr light, 12 hr dark cycle. Prior to the experiment, individual flies were anaesthetized in an icebox. The anaesthetized flies were placed on a Peltier stage maintained at  $4^\circ\text{C}$  and glued to a 0.15 mm V2A stainless steel pin using UV-curing glue. The animals were given at least 20 min to recover from the anesthesia before introducing them to the experimental setup. All experiments were carried out in the last 4 hr of the animal’s subjective day at  $20^\circ\text{C}$ .

**3.2 Fly virtual reality experiments.** Experiments were conducted in a flyVR setup procured from loopbio GmbH. Tethered flies were positioned in the center of an acrylic bowl of diameter 20 cm, lowered 7 cm from the bowl surface. The bowl is used as a hemispherical projection surface for the visual stimuli. Flies were filmed from an angle using a camera (Basler acA645-100gm; lens: kowa 25 mm/f 1.4) equipped with an infrared filter (Lee filters, transmission above 730 nm) at 100 Hz and were illuminated using infrared light at 850 nm to track their heading direction. We assume that the fly flies at constant speed of 0.2 m/s in this direction to close the loop in our 2D virtual reality setup. A constant speed assumption causes the visual stimulus to update even when the fly stops flapping its wings. To ensure that the fly flies (flaps its wings) during the entire course of the experiment, the experimenter gently blew on it when it stopped flying. Trials where flies stopped flying more than five times during the course of the experiment were excluded from further analyses. This step in data filtering distinguishes our fly data from the locust and fish data, where the VR systems are designed for freely-moving animals. It results in us selecting for flies that are inclined to fly (flap their wings) consistently, causing the raw trajectories to have lesser noise from a stop and go motion. However, it is also worth noting that this filtering still chose all individuals as long as they flew, regardless of whether or not they flew to a target.

Other reasons for a fly to be excluded from analyses were: i) Too much glue on the tether prevented the fly from flapping its wings freely, making it unsuitable for the experiment. ii) Too little glue on the tether would occasionally result in flies freeing themselves and flying away. iii) While our experimental room was temperature controlled, humidity varied over the course

402 of the experiment. On days of low humidity, an external humidifier was used. Thus, conditions were not always ideal for a  
403 fruit-fly to “want” to flap its wings and fly. iv) The fly did not perform the stripe fixation task.

404 **3.3 Visual stimuli.** Custom 3D scenes were designed using 3D modelling program Blender (version 2.77) and projected on the  
405 bowl with a projector (Optoma ML750e DLP) at 120 Hz refresh rate. The stimulus created was a white ‘shadeless’ cube of side  
406 50 m that served as background and ten black cylinders of 1m diameter each. Making the objects shadeless removes interaction  
407 of the object with light and hence removes any edges that may otherwise be visible on the cube. The position of each cylinder  
408 was determined from an SQLite database that was generated automatically (see experimental design for details). Pillars that  
409 were not part of the current stimulus were placed at >100 m distance where they were visually occluded by the cube.

410 **3.4 Data collection.** Tethered *Drosophila melanogaster* were exposed to either a two-choice or a three-choice decision task in the  
411 virtual reality environment. Each experimental trial lasted 15 min where flies were exposed to five stimuli—three experimental  
412 stimuli and two control stimuli. The experimental stimuli consisted of two or three cylinders (depending on the experimental  
413 condition) that were presented to the animal in three different angular conditions. The order in which the stimuli were  
414 presented were randomized. The control stimulus was presented before and after the experimental conditions. This was a stripe  
415 fixation task where the fly was exposed to a single cylinder and was expected to orient and fly towards this cylinder. This is  
416 a well-known response in tethered *Drosophila* and flies that did not perform this were excluded from further analyses. The  
417 actual position of cylinders in all stimuli were randomized rotationally to prevent effects of any directional bias that may arise  
418 from the geometry of the physical setup around the fly. In all conditions, the position of the fly was reset to the origin once it  
419 reached a cylinder or flew a corresponding distance in any direction. To ensure true randomizations during our experiment, we  
420 implemented them prior to starting any experimentation. An SQLite database was created which had positions of all posts for  
421 all experiments. A total of 60 flies were tested in the VR setup. Of these, 30 flies were exposed to a stimulus that consisted  
422 two targets, and 30 flies were exposed to a stimulus that consisted three targets. Our analyses include 70% and 74% of all the  
423 tracks adopted by flies in the two-choice and three-choice decision-making scenarios respectively. The remaining tracks were  
424 excluded because these were trials where none of the targets were approached by the fly within the remaining experimental  
425 duration, and hence, were considered to not constitute a decision-making scenario.

426 **3.5 Data analysis.** Each trajectory of a fly (travelled in virtual space from the origin till the position when the location of the fly  
427 was reset) was considered to be an event. We rotated all trajectories such that the x-axis points from the origin, to the center  
428 of mass of the targets (see Fig. S11 for fly trajectories in the presence of two and three options). To visualize trajectories in  
429 the various experimental conditions, we create time-normalized (proportion of maximum) density plots. Each density plot  
430 was constructed by picking, for each pixel, the maximum value among normalized density plots (proportion of maximum)  
431 for varying times in a sliding time window. In the two-choice case, flies show no bias towards either target, and the trial results are  
432 symmetric about the  $x$ -axis. For the three-choice case, we observe some asymmetry that may arise from random perturbations  
433 that inherently affect individual trajectories. We symmetrize our data by mirroring it about  $y = 0$  to remove this asymmetry  
434 (based on the two-choice results). Next, to quantify the decision points, we fold the data about the line of symmetry,  $y = 0$ .  
435 We then applied a density threshold to the time-normalized (proportion of maximum across a sliding time window) density  
436 plot to reduce noise and fit a piecewise phase transition function to quantify the bifurcation.

$$y = \begin{cases} 0 & x \leq x_c \\ A|x - x_c|^\alpha & x > x_c \end{cases} \quad [56]$$

437 where  $x_c$  is the critical bifurcation point,  $\alpha$  is the critical exponent, and  $A$  is the proportionality constant. To avoid bias in the  
438 fit that arises from  $y = 0$  part of the data (to the left of the bifurcation), we exclusively fit the above function in a range starting  
439 near to the suspected bifurcation point. For the three-choice case, the piecewise function is fit to each bifurcation separately.  
440 Additionally, for each bifurcation we also performed randomization tests where we repeated the exact fit procedure described  
441 above to data where the trajectories were randomized by keeping the  $x$ -coordinates, and swapping the  $y$ -coordinates with  
442 values from other random events. Occurrences of a bifurcation is then assessed using the following criteria: (a) The bifurcation  
443 occurred between  $x = 0$  and  $x = T_x$ , where  $T_x$  is the  $x$ -coordinate of the two targets in consideration, (b) The critical exponent  
444  $0.2 < \alpha < 2$ , and (c) The proportionality constant  $A > 0.2$ . Based on these criteria, randomizations showed that the resultant  
445 fit to our experimental data were highly significant ( $p < 0.01$  for binary choice and  $p < 10^{-4}$  for the three-choice case).

446 Based on the amount of time it took a fly to reach one of the available targets, we also classified individual fly tracks into  
447 one of two categories—direct tracks and non-direct tracks. This allowed us to quantify the proportion of tracks where the  
448 individuals exhibited the bifurcations predicted by our model (see Fig. S11, A and H). Such between-individual variability in  
449 response is expected, and it is very difficult to ascertain its source. Recent work with fruit flies (44, 45) has shown non-heritable  
450 variation in neural connectivity results in behavioral differences in individual tendency to orient, and move, towards a vertical  
451 stripe target. In our model, such differences can be accounted for by variation in the directional tuning of spins. A high neural  
452 tuning (low  $\nu$ ) results in more directed tracks (Fig. S14).

## 4. Experiments with desert locusts (*Schistocerca gregaria*)

**4.1 Locust preparation.** All experiments were conducted on instar 5 desert locusts (*Schistocerca gregaria*) raised in the Animal Research Facility of the University of Konstanz. Locusts were moved to the experimental room one night prior to the experiment, where they were maintained at 26 °C. Experiments were then conducted at ~31 °C and 20 – 22% relative humidity with fully intact locusts. Each locust was used only once.

**4.2 Locust virtual reality experiments.** Experiments were conducted in a locustVR setup procured from loopbio GmbH (Fig. S10). The setup consists of three main components: (a) the locomotion compensator, (b) the recording system with a closed-loop extension, and (c) the FreemoVR system (46).

The locomotion compensator (a) is a two-dimensional treadmill composed of a hollow polyethylene sphere of diameter 60 cm. Two servo-motors with rotary encoders turn the sphere to compensate for the animal's movement, allowing it to move infinitely on the sphere (mechanics are adapted from (47)). The recording system with closed-loop extension (b) consists of a recording unit—a 100 fps infrared machine vision camera and an LED spotlight at 850 nm (infrared) and functions as the tracking and feedback-loop component of the system. Tracking the animal's movement facilitates feedback to the locomotion compensator to keep the animal centered on the sphere. Optical tracking is performed using a contrast-based method. The optical center of mass of the animal is detected and its deviation from the center of the sphere is converted into a compensation response of the motors. Finally, the closed-loop extension software feeds the animal movement to the VR system (c) to update projection of the stimulus accordingly. A vertical cylinder (70 cm tall; 80 cm diameter) was used as the projection surface and projections were done using three Optoma GT1070Xe projectors with overlapping projections. From the animal's perspective, this projection surface covers 360° field-of-view horizontally, and 74.9° vertically.

**4.3 Visual stimuli.** Custom 3D scenes were designed using 3D modelling program Blender (version 2.77) and projected on the projection surface. The stimulus created was identical to what is described above for flies (see Section 3.3), with the exception that the target cylinders for the locusts were of diameter 0.2 m.

**4.4 Data collection.** The data collection procedure for the desert locusts was identical to the procedure adopted for flies (see Section 3.4) except each experimental trial lasted 48 min—the three experimental stimuli lasted 12 min each, and the two control stimuli lasted 6 min each. As with the flies, the control stimulus was a stripe fixation task for the two-choice experiments. For the three-choice experiments, however, this was modified to be a two-choice decision task. A total of 156 locusts were tested in the VR setup. Of these, 57 locusts were exposed to stimulus that consisted two targets, and 99 locusts were exposed to a stimulus that consisted three targets (see Fig. S12 for locust trajectories during decision-making in the presence of two and three options). Based on our data filtering criteria, 122 out of the 156 locusts were used in the analyses. Of these, 35 locusts performed decision-making in the presence of two targets and 87 locusts performed decision-making in the presence of three targets. Of the locusts that were included in our analyses, 31% and 29% of tracks were used for further analyses in the two-choice and three-choice decision-making scenarios respectively. Note that this number is much smaller than it was for flies (70% and 74% for two- and three-choice experiments respectively). This difference arises from the additional data filtering step for the flies. Because the flyVR requires the animal to be tethered and assumes that it flies at a constant speed in the direction where it is facing, we exclude any animal that stops flying (flapping its wings) more than five times. The locustVR however is designed for freely walking animals. Hence, the animal is free to stop, and not move towards any of the targets presented to them. Because, the animal did not choose any of the presented targets, we consider these tracks to not constitute a decision-making scenario.

**4.5 Data analysis.** The analyses procedure adopted for the desert locusts was identical to the procedure adopted for flies (see Section 3.5). Randomizations performed on locust trajectories also showed that the resultant fit to these experimental data were highly significant ( $p < 0.01$  for binary choice and  $p < 10^{-4}$  for the three-choice case).

Similar to the flies, the locust trajectories were also classified as direct, or non-direct tracks. However, because the locustVR system allowed the animals to stop and reconsider movement during the decision-making process, we added an additional category to classification of individual locust tracks viz. the wandering tracks (Fig. S12, A and J). Once again, we find that variability in directedness of locust tracks predominantly occurs at the individual level. This type of non-heritable behavioral variability in space-use is expected, and is shown to be the case in many species including flies (44, 45), fish (48), pea aphids (49), mice (50) and crayfish (51).

## 5. Experiments with larval zebrafish (*Danio rerio*)

**5.1 Fish preparation.** All experiments were conducted on 1 cm ± 0.1 cm long zebrafish (*Danio rerio*) of age 24 to 26 days post-fertilization raised in a room at 28 °C on a 16 hr light, 8 hr dark cycle. The fish were bred and raised by the animal care staff of the Department of Collective Behaviour at the Max Planck Institute of Animal Behavior and the University of Konstanz. Fish were transferred to the experimental room at least 12 hr prior to the experiments in water from their holding tanks. This ensured that the water quality and temperature in the experimental room was the same as in their holding facility. This water was also used in the VR setups where a water change was done once a day. All fish were tested individually. They were naive, and chosen at random from their holding tanks. All experiments were conducted in accordance with the animal ethics permit approved by Regierungspräsidium Freiburg, G-17/170.



509 **5.2 Fish virtual reality experiments.** Experiments were conducted in a fishVR setup procured from loopbio GmbH (See (46) for  
510 setup details). Larval zebrafish were tested in an acrylic bowl of diameter 34 cm between 07:00 and 19:00. Once a fish was  
511 introduced in the arena, it was given 20 min to acclimatize to the environment. This was followed by a 10 min control where it  
512 was presented a single virtual conspecific circling the arena in a circle of radius 8 cm (Fig. S16). The purpose of this control  
513 was to assess whether the real fish would follow a virtual conspecific. We later included data from all fish in our analysis as  
514 nearly all of them followed the virtual fish during this control. After the control, the real fish was exposed to choice experiments  
515 that lasted 1.5 hr with the virtual fish initialized with random lateral distances between them and random swim direction.

516 **5.3 Visual stimuli.** Custom 3D scenes were designed using 3D modelling program Blender (version 2.77) and projected on the  
517 bowl with a projector (Optoma ML500) at 100 Hz refresh rate. The stimulus created was a larval zebrafish of length 1 cm. The  
518 fish was set to swim at an average speed of 4 cm/s with burst-and-glide motion extracted from a random real fish’s swimming  
519 pattern (Fig. S16). The background for the stimulus was light blue, the default projection color on the Optoma projector.

520 **5.4 Data collection.** As choice experiments, the real fish was exposed to two or three virtual conspecifics that swam side-by-side  
521 with lateral distance between them varying from 0.5 cm to 10 cm (in steps of 0.5 cm). The virtual fish swam back-and-forth at a  
522 3 cm depth, and along a straight line of length 24 cm (Fig. S15). To exclude boundary effects and the effect of sharp turns that  
523 the virtual fish make near the edge, we only consider data where the virtual fish are farther than 5 cm from the boundary for  
524 further analyses. The following filters were used to extract data where the real fish was considered to be potentially interacting  
525 with virtual conspecifics:

- 526 1. A distance filter determined whether the real fish had the opportunity to interact with a virtual fish. If the real fish was  
527 within 5 cm front-back distance or 5 cm left-right distance of the outermost virtual fish, it was considered to be within  
528 interaction range.
- 529 2. Since the real fish receives no feedback from its virtual conspecifics, we only consider cases where the virtual fish lead  
530 the real fish i.e. cases where the virtual fish are ahead of the real fish in a coordinate system centered at the real fish’s  
531 frame of reference, and where the real fish is behind the virtual fish in a coordinate system centered at the centroid of the  
532 virtual fish and pointing in the direction of their motion.
- 533 3. Since we are interested in which conspecific(s) the real fish will follow, we exclude all data where the angle between the  
534 real fish’s direction and the virtual fish’s direction ( $\phi$ ) is larger than  $30^\circ$ .
- 535 4. Finally, for the purpose of analysis, we switch identities of the virtual fish after each turn. This is done to ensure relative  
536 positions of the virtual fish are conserved; that virtual fish are always treated as being to the left or right of the real fish.

537 A total of 440 fish were tested. Of these, 198 fish were exposed to decision-making with two virtual targets, 39 fish were  
538 exposed to decision-making with three targets, and 50 fish were exposed to decision-making with three targets in asymmetric  
539 geometry. In the two-choice case, the real fish experienced five different virtual fish speeds. Our analyses focus only on data  
540 where the virtual fish swim at an average speed of 4 cm/s, the average swim speed of larval zebrafish. For the experiments  
541 in asymmetric geometry, the real fish was exposed to choice experiments where distance between the center virtual fish and  
542 its closer neighbor was 0.03 m and its distance to the other neighbor was 0.09 m (see main Fig. 4). Note that the left-right  
543 position of the two fish closer to each other was randomized, indicating that this pattern did not result from handedness in  
544 individual fish. We also conducted experiments where the real fish was exposed to a single virtual fish, or where two real fish  
545 were tested in pairs with no stimuli. 39 fish were exposed to a single virtual fish while 114 fish were tested in pairs (57 pairs)  
546 and without stimuli. When real fish were tested in pairs, data were filtered to only consider cases when the two fish maintained  
547 a distance of 0.5 cm to 20 cm between them (tracking accuracy reduced at distances closer than this). Relative 3D positions  
548 were then collected by reorganizing the follower’s position in the leader’s coordinate frame (all relevant filters used in the  
549 virtual fish case were also used here). Comparing these two cases—two real fish compared to one real fish swimming with  
550 one virtual fish—we find that in the VR, and otherwise, the two fish swim on the same plane (Fig. S17). Hence, all further  
551 analyses for decision-making were conducted on this plane in 2 dimensions.

552 **5.5 Data analysis.** For the symmetric case, the main focus of our analyses was to reveal the role of lateral distance between  
553 the virtual fish  $L$ , on the decision of the real fish to follow these virtual targets. We applied the above mentioned filters to  
554 the data and obtained a density plot of the real fish’s position in a coordinate system centered at the centroid of the virtual  
555 fish’s positions (Fig. S15; see Fig. S18 for density plots for varying lateral distance between the virtual fish). The marginal  
556 distributions along the direction of the virtual fish’s motion for various lateral distances  $L$  are then normalized (proportion of  
557 maximum) and stacked to obtain the bifurcation plot (Fig. S15). This figure plot shows the effect of virtual fish geometry on  
558 the real fish’s position while following them. An identical protocol was followed to obtain the three-choice bifurcation plot. For  
559 the asymmetric case, we obtain the probability density function of the position of the real fish along the axis perpendicular to  
560 its direction of motion. As predicted by our model, the larval zebrafish predominantly assumes one of two positions behind its  
561 virtual conspecifics (see main Fig. 4 for comparison of model to data).

## 562 **Supplementary Text**

### 563 **Experiments in virtual reality**

564 Testing our model predictions experimentally is expected to be difficult. If we are correct, by far the clearest window into the  
565 system dynamics will be when animals are presented with two, or more, identical options. This is due to the fact that the very  
566 reason that the brain should exhibit bifurcation dynamics—to maximize sensitivity—will also result in amplification of subtle  
567 differences between options to obscure our ability to see the underlying system bifurcations. The fact that the experimentalist  
568 may often be unaware of such differences (such as a slight air motion, or light gradient, or other differences imperceptible to  
569 humans), and that these differences can break the symmetry (between apparently identical options) makes these experiments  
570 extremely challenging with a conventional design. To address this limitation, we conduct our experiments in immersive virtual  
571 reality (46) in which we can (instantly) randomize our starting conditions, and conduct relatively high-throughput analysis of  
572 spatial decision-making.

### 573 **Predictions for symmetric geometries and increasing number of targets**

574 So far, we have discussed predictions from the model and experimental results for the two- and three-choice cases for specific  
575 geometries. However, as described section 5.4, we conducted choice experiments for fruit-flies in three different geometrical  
576 configurations. An especially interesting case here is one where the targets are in radial symmetry—two targets 180° apart  
577 or three targets 120° apart. Once again, we find congruence among predictions of our neural model, the animal collectives  
578 model and behavioral experiments with flies (Fig. S9). Because these symmetric conditions represent cases where the animal is  
579 already beyond the bifurcation angle, we find that it goes straight to one of the available targets. Further, to illustrate model  
580 results beyond three targets, we also ran simulations for four, five, six, and seven targets. Once again, our predictions hold and  
581 the agent continues to eliminate targets based on egocentric geometry, thus binarising its decisions (see Fig. 2 in main text).

### 582 **A mental representation of space**

583 Based on direct comparison with experimental results from fruit-flies (*Drosophila melanogaster*), desert locusts (*Schistocerca*  
584 *gregaria*) and zebrafish (*Danio rerio*), we conclude that “cosine-shaped” interactions cannot explain trajectory patterns observed  
585 in real animals; that the brain represents space in a non-Euclidean fashion and excitatory interactions among neurons are more  
586 local (Fig. S1). Beyond this, the bifurcation patterns observed are agnostic to the exact nature of neural interactions. We  
587 illustrate this by using truncated Ricker wavelet (Mexican hat-shaped) neural interactions that produce similar predictions  
588 at the level of animal movement (Fig. S1). We specifically chose this function as it has been shown to represent orientation  
589 selectivity in neurons of the visual cortex (52).

$$J_{ij} = A (1 - h\theta_{ij}^2) \exp(-h\theta_{ij}^2) - c \quad [57]$$

590 where,  $A$  is the amplitude of the Ricker wavelet/Mexican hat,  $\theta_{ij}$  is the angle between preferred directions of spins  $i$  and  $j$ ,  $h$  is  
591 the concentration of the hat and  $c$  represents global inhibition. Thus, neural interactions with both long-range inhibition and  
592 global inhibition make similar predictions regarding the animal’s movement.

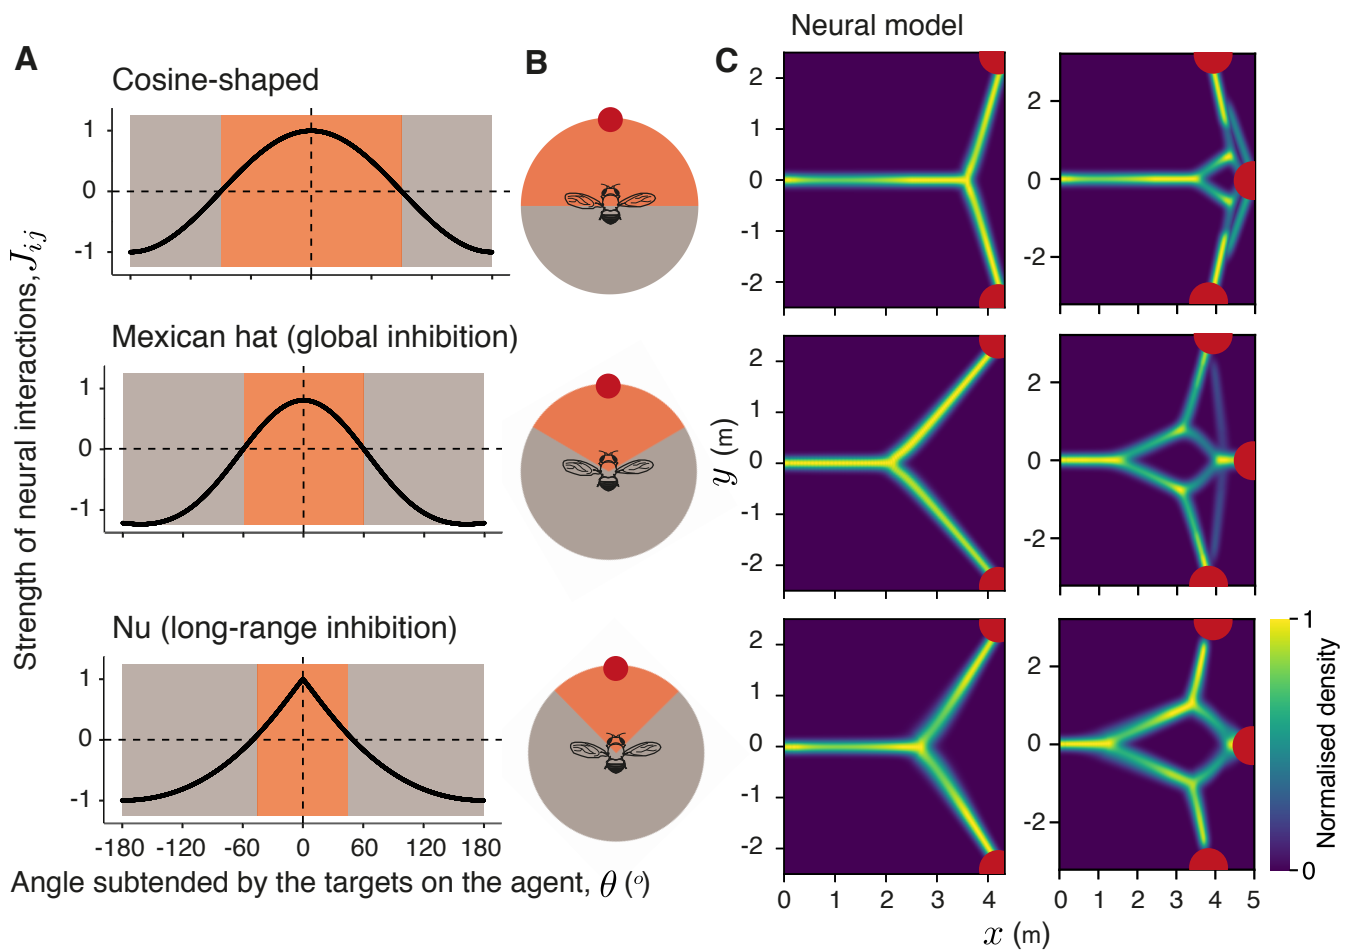

**Fig. S1.** Relationship between the nature of neural interactions and the bifurcation patterns observed in the agent's trajectory. (A) The strength of neural interactions as a function of the angular distance between directions encoded by the spins. We explore models with three different type of neural interactions, a global "cosine-shaped" interactions model, and two local models—with a truncated Mexican hat-shaped interaction curve (amplitude  $A = 1.8$ , hat concentration  $h = 0.25$  and global inhibition  $c = 1$ ), and a model where  $\nu = 0.5$ . The orange region indicates angles where  $J_{ij}$  is positive—excitatory interactions, and the grey region indicates negative  $J_{ij}$ —inhibitory interactions. (B) A simplified representation of this in polar coordinates. (C) Density plots of trajectories adopted by a model for the corresponding neural interaction curves. The axes represent  $x$ - and  $y$ -coordinates in Euclidean space. Comparing agent trajectories from the simulations with experimental results (see Fig. 1 in main text) from fruit flies and desert locusts reveals a lack of fit by a model with "cosine-shaped" interactions.

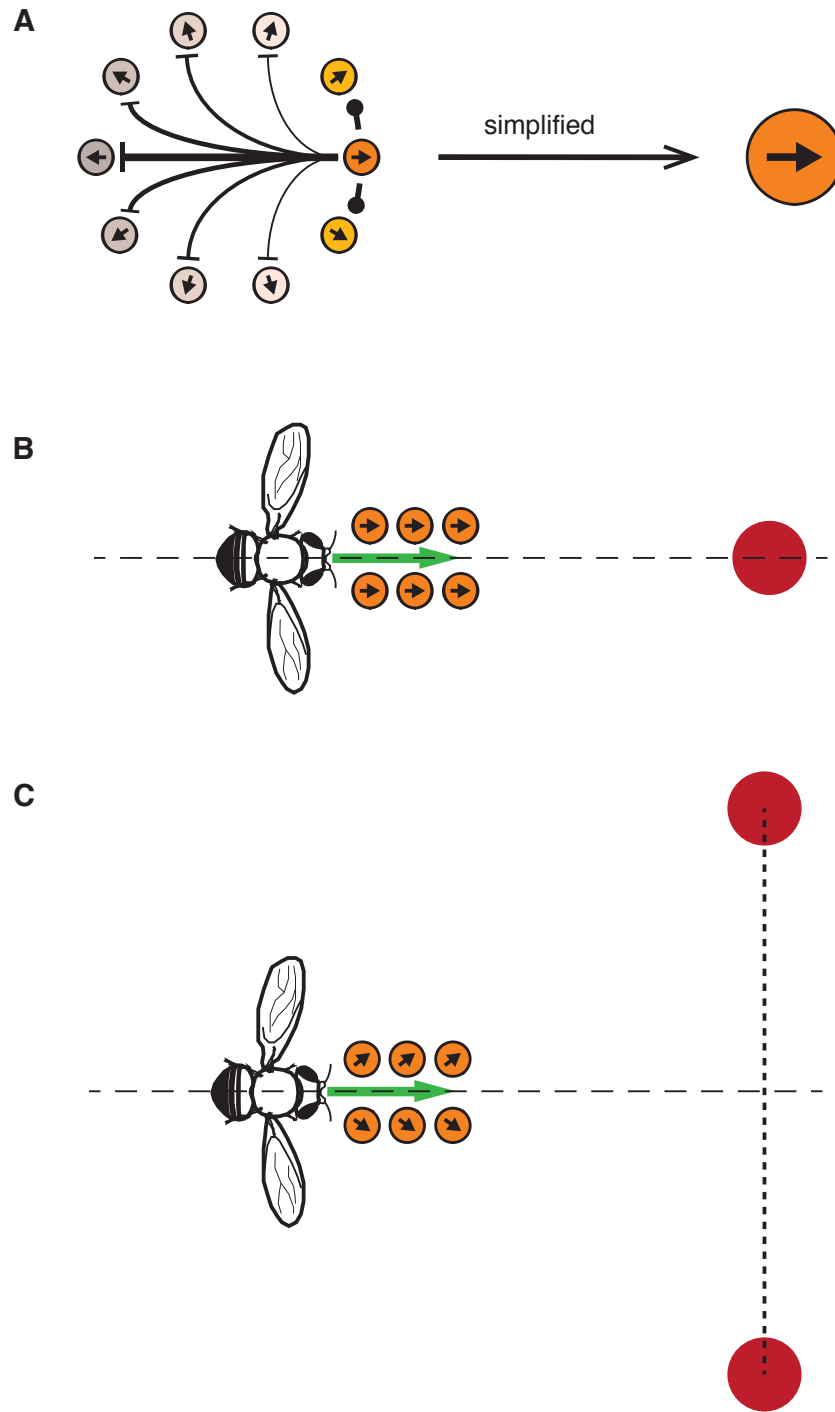

**Fig. S2.** Schematic of the goal-direction cells in an animal's brain when moving through space. (A) It is known that an ensemble of neurons in the brain collectively represents direction to goals (33). Here, we simplify this by representing spins in the model that individually represent direction to a target. (B) The decision-making ensemble is assumed to be a collection of such goal-directed spins. (C) In presence of multiple targets, the ensemble is composed of multiple neural populations that encode directions to the different targets. The agent's decision is thus a consensus among spins in this ensemble.

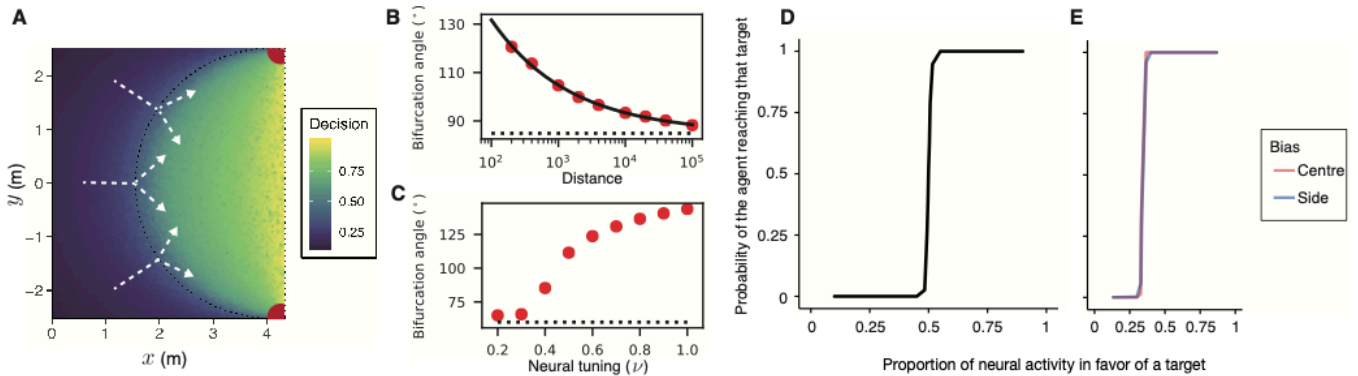

**Fig. S3.** Robustness of bifurcations to spatial and system parameters. (A) A heatmap showing whether or not the neural network has reached a consensus. The agent makes a decision close to the black dotted arc, which represents the locus of a point that is equiangular from the two targets. Angle subtended by the targets on the animal determines the location of the bifurcation. White dotted lines show example trajectories of animals as they would move through space. The axes represent  $x$ - and  $y$ -coordinates in Euclidean space. The exact value of the critical bifurcation angle results from the interplay between two timescales—a timescale for movement and one for the neural dynamics. (B) Effect of the starting distance to the targets on the critical bifurcation angle. We fit an exponential decay to the points to obtain the critical angle (represented here as a dotted line). (C) The neural tuning parameter ( $\nu$ ) also influences the bifurcation angle. Here, the angle flattens at  $60^\circ$  (represented by the dotted line) as this is the starting angular condition where the agent is initialized. (D-E) Minor difference between the targets causes the agent to choose the correct target with near certainty. The slope of the sigmoid indicates sensitivity of the system. D shows this sensitivity in the presence of two targets while E shows this for the three-target case. Here, we separate sensitivity to the center target vs sensitivity to a side target. As shown, the agent is equally sensitive to all three targets in its environment. See Table S1 for model parameters used here.

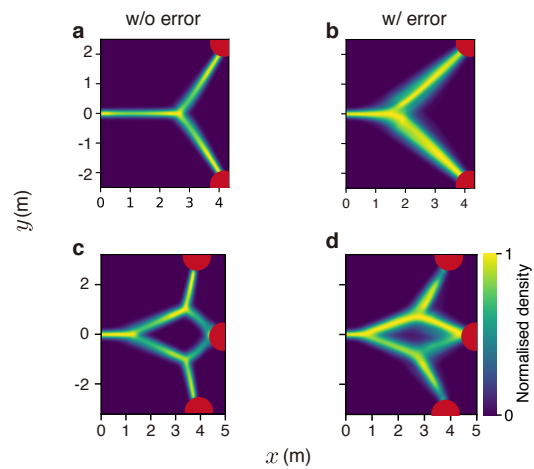

**Fig. S4.** The role of directional error on simulated trajectories. Results of our neural model without (A, C) and with (B, D) implementation of gaussian error and the 'overlap' function for decision-making in a two- (A and B) and three-choice (C and D) context. The symmetric case modelled here puts the targets at an angular configuration where the 'overlap' function does not affect predicted results. However, Gaussian error still introduces noise in the simulated trajectories. Parameters used were identical to Fig. S8. The axes represent  $x$ – and  $y$ –coordinates in Euclidean space.

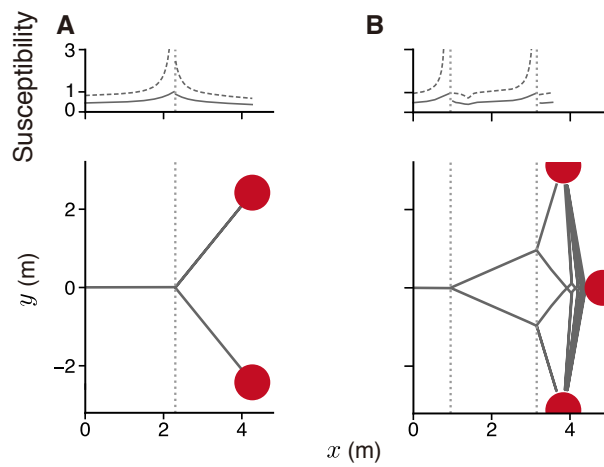

**Fig. S5.** Predicted trajectories and susceptibility from the mean-field approximation. Predicted animal trajectories for decision-making in a two-choice (A) a three-choice (B) context. In both A and B, the susceptibility in the mean-field approximation (dashed line) diverges at the bifurcation points (represented here by the dotted vertical line). The solid line represents the short time average responses of one spin flip in reaction to one extra spin towards one of the targets. The short time response shows a peak at the bifurcation point and is normalized by its maximal value. See Table S1 for parameters used.

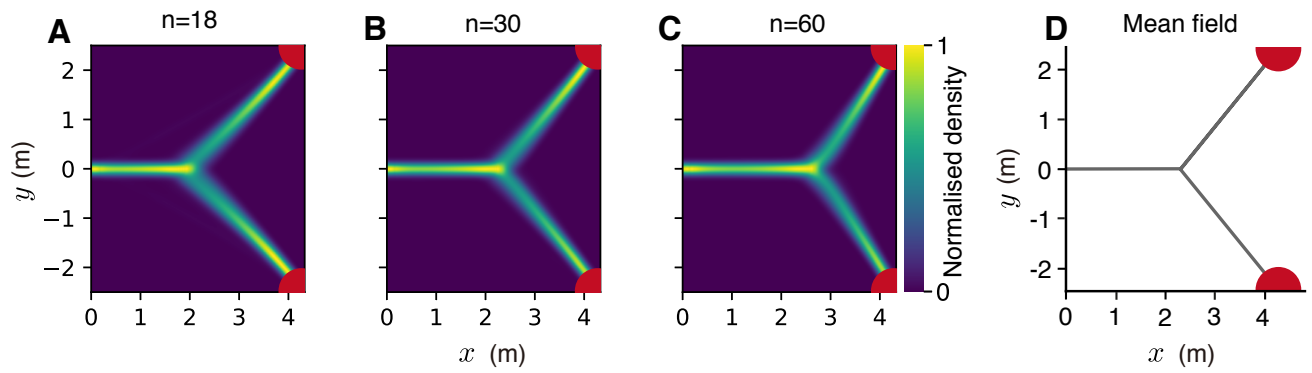

**Fig. S6.** Effect of system size on observed bifurcations. Comparison of panels A-D shows that bifurcation patterns are observed both for small and large system sizes. Panels A, B, and C show trajectories predicted by the neural model for system sizes  $N = 18$ ,  $N = 30$ , and  $N = 60$  respectively. Panel D shows the predicted trajectories at the mean-field limit of very large system sizes  $N \rightarrow \infty$ . The axes represent  $x$ - and  $y$ -coordinates in Euclidean space.



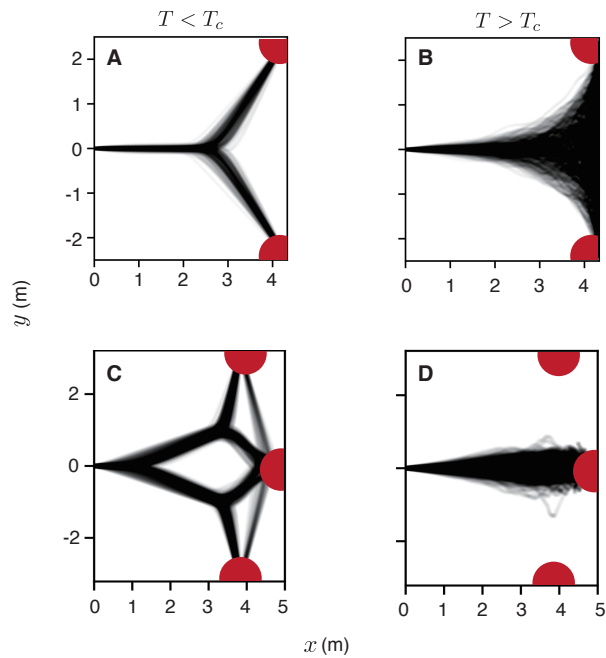

**Fig. S7.** Role of neural noise on producing the experimentally observed bifurcation patterns. Each panel contains trajectories from 500 replicate simulations of our neural decision-making model. The model reproduces experimentally observed bifurcation patterns below a critical level of neural noise (A and C). Above this critical noise level, the agent exhibits diffusive movement for the two-choice case (B) with a bias towards more central targets (D). A and B show trajectories for decision-making in the presence of two targets, while C and D show trajectories for decision-making in the presence of three targets. The axes represent  $x$ - and  $y$ -coordinates in Euclidean space. See Table S1 for parameter values used in A and C. B and D were produced with identical parameters except the neural noise parameter  $T = 2.0$ .

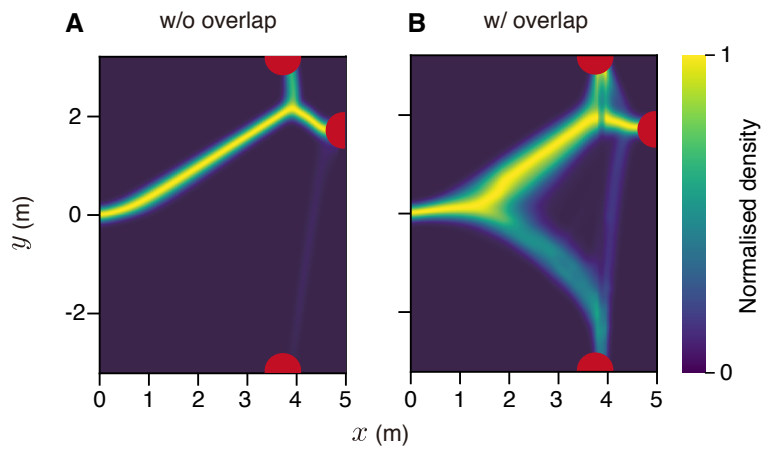

**Fig. S8.** Decision-making in asymmetric geometries. Results of our neural model without (A) and with (B) implementation of the 'overlap' function. This function allows us to account for spatial geometries where some targets may be in directional proximity compared to others. The Gaussian error in B was of standard deviation  $\sigma_\theta = 0.25$ . The axes represent  $x$ - and  $y$ -coordinates in Euclidean space.

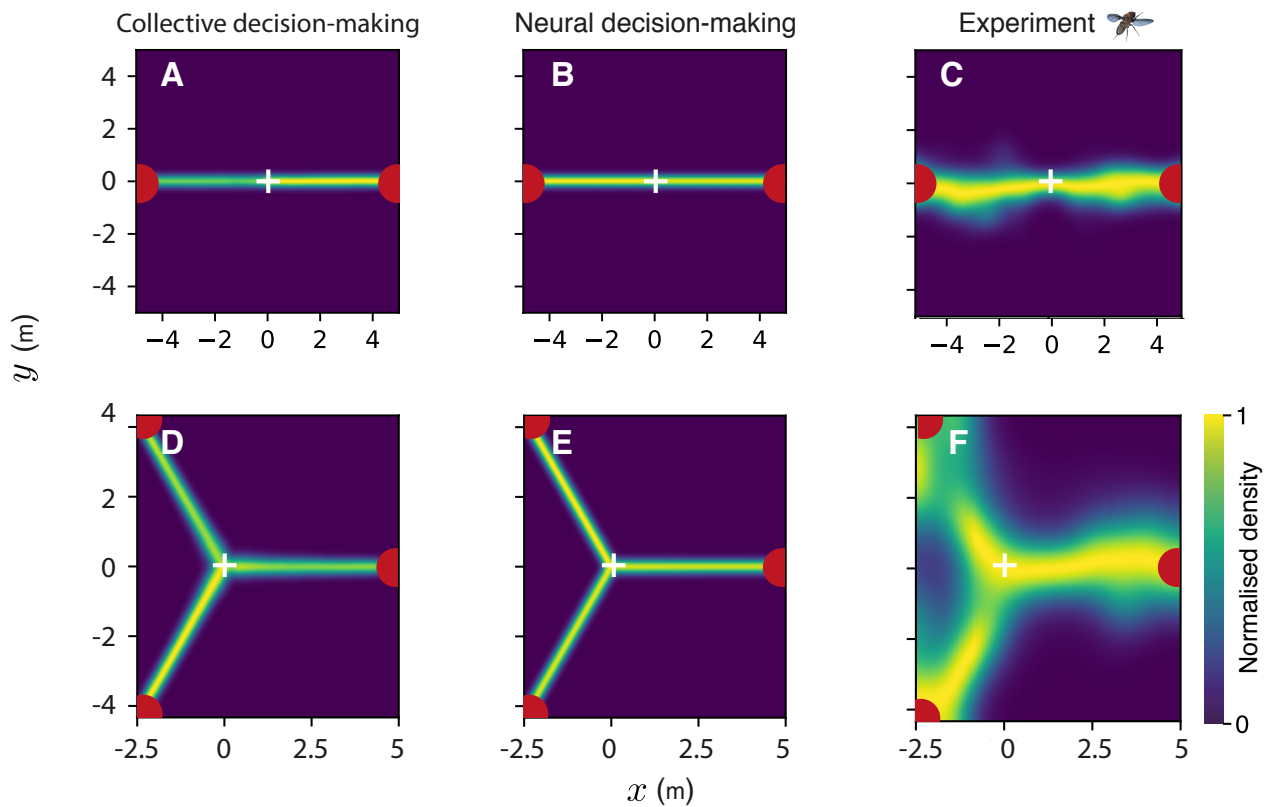

**Fig. S9.** Decision-making in radial symmetry. Trajectories predicted by two different models of decision-making and experimental trajectories obtained from fruit flies, all in the presence of two and three targets placed in radial symmetry. The animal starts at  $(0, 0)$  and chooses one of the available targets. The axes represent  $x$ - and  $y$ -coordinates in Euclidean space. Panels A and D show results for two- and three-choice decision-making from a collective decision-making model, B and E show results from our neural decision-making model, and C and F show experimental results of fruit-flies exposed to two and three identical targets respectively. See Table S1 for parameters used in A and D, and Table S2 for parameters used in B and E.

**A** Front global view

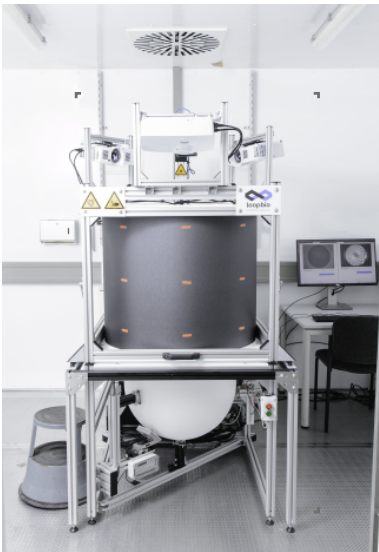

**B** Top view

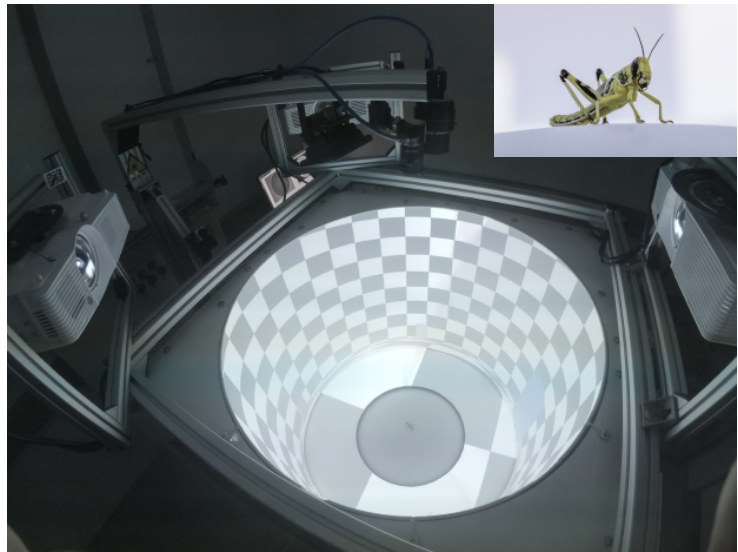

**Fig. S10.** Overview of the locustVR experimental setup. (A) The front-view of the locustVR setup shows the three projectors, the cylindrical projection surface, and the locomotion compensator sphere. (B) The top-view of the setup shows a custom checkerboard stimulus along with the locust on the center of the locomotion compensator sphere. The inset shows a zoomed in side-view of the locust.

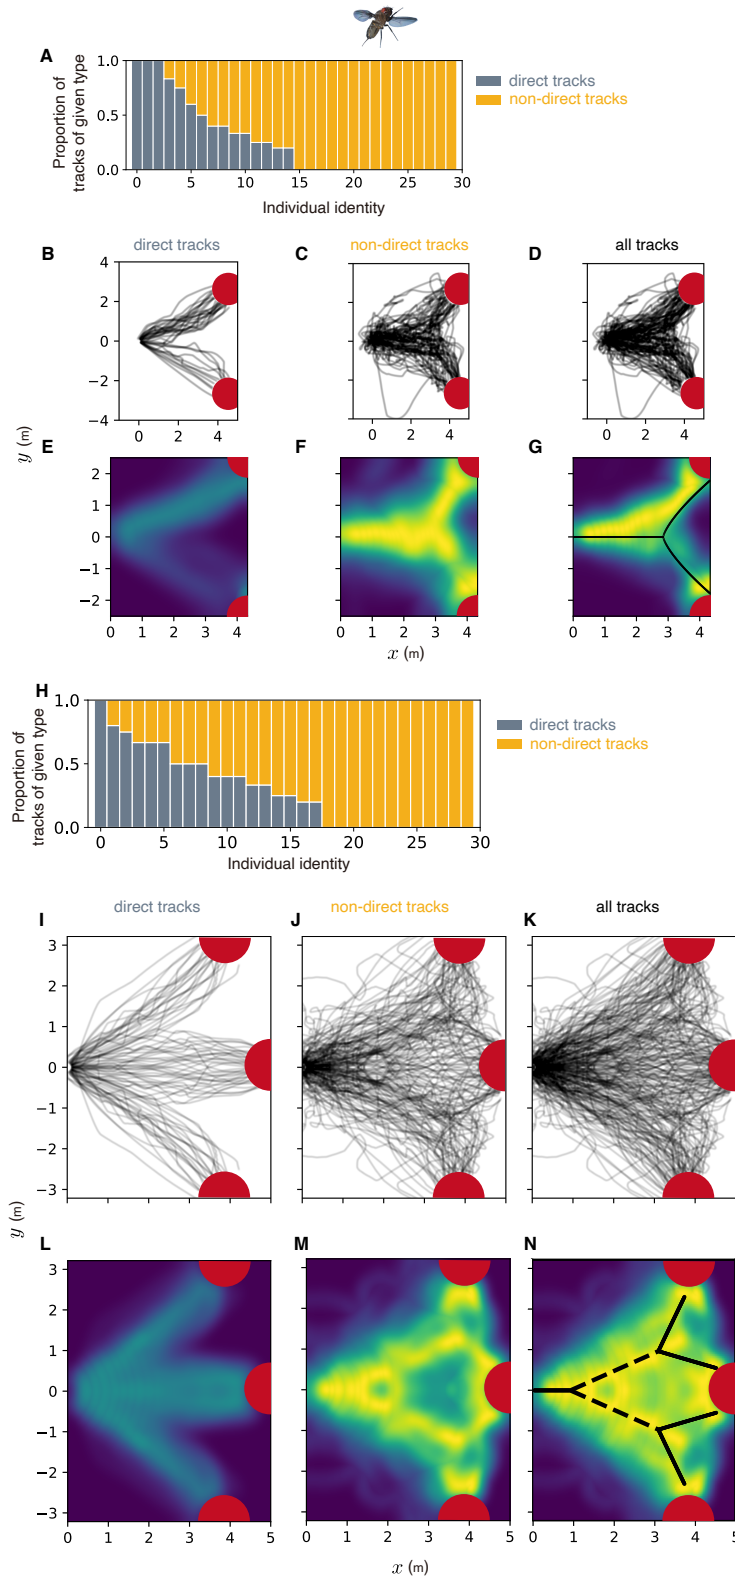

**Fig. S11.** Characterisation of fruit fly tracks at the individual and population level when exposed to two and three targets. A and H show consistency in individual behavioral tendencies in exhibiting either direct or non-direct tracks. (B-G) present raw trajectories (B-D) and density plots (E-G) of fruit flies exposed to two targets. The axes represent  $x$ - and  $y$ -coordinates in Euclidean space. A shows trajectories where the fruit fly reached the target in a relatively short duration, where trajectories to the targets were relatively direct, and B shows the remaining trajectories. E and F show the corresponding density plots, normalized such that the maximum intensity in F is set to 1, and in E is set to the proportion of trajectories in F relative to this condition. D and G show the raw trajectories and the normalized density plot for all fly experiments combined. Similarly, I-N present raw trajectories (I-K) and density plots (L-N) of fruit flies exposed to three targets. I and L show direct trajectories to a target and the corresponding density plot. J and M show the remaining trajectories that potentially exhibit the bifurcations, and the corresponding density plot. K and N show raw trajectories and the density plot for all fly experiments combined. Note that the three-choice trajectories here are symmetrized for the sake of visualization. Our conclusions do not differ when we include all the fly data. To show this, we fit the piecewise phase transition function (shown in black) to density plots G and N.

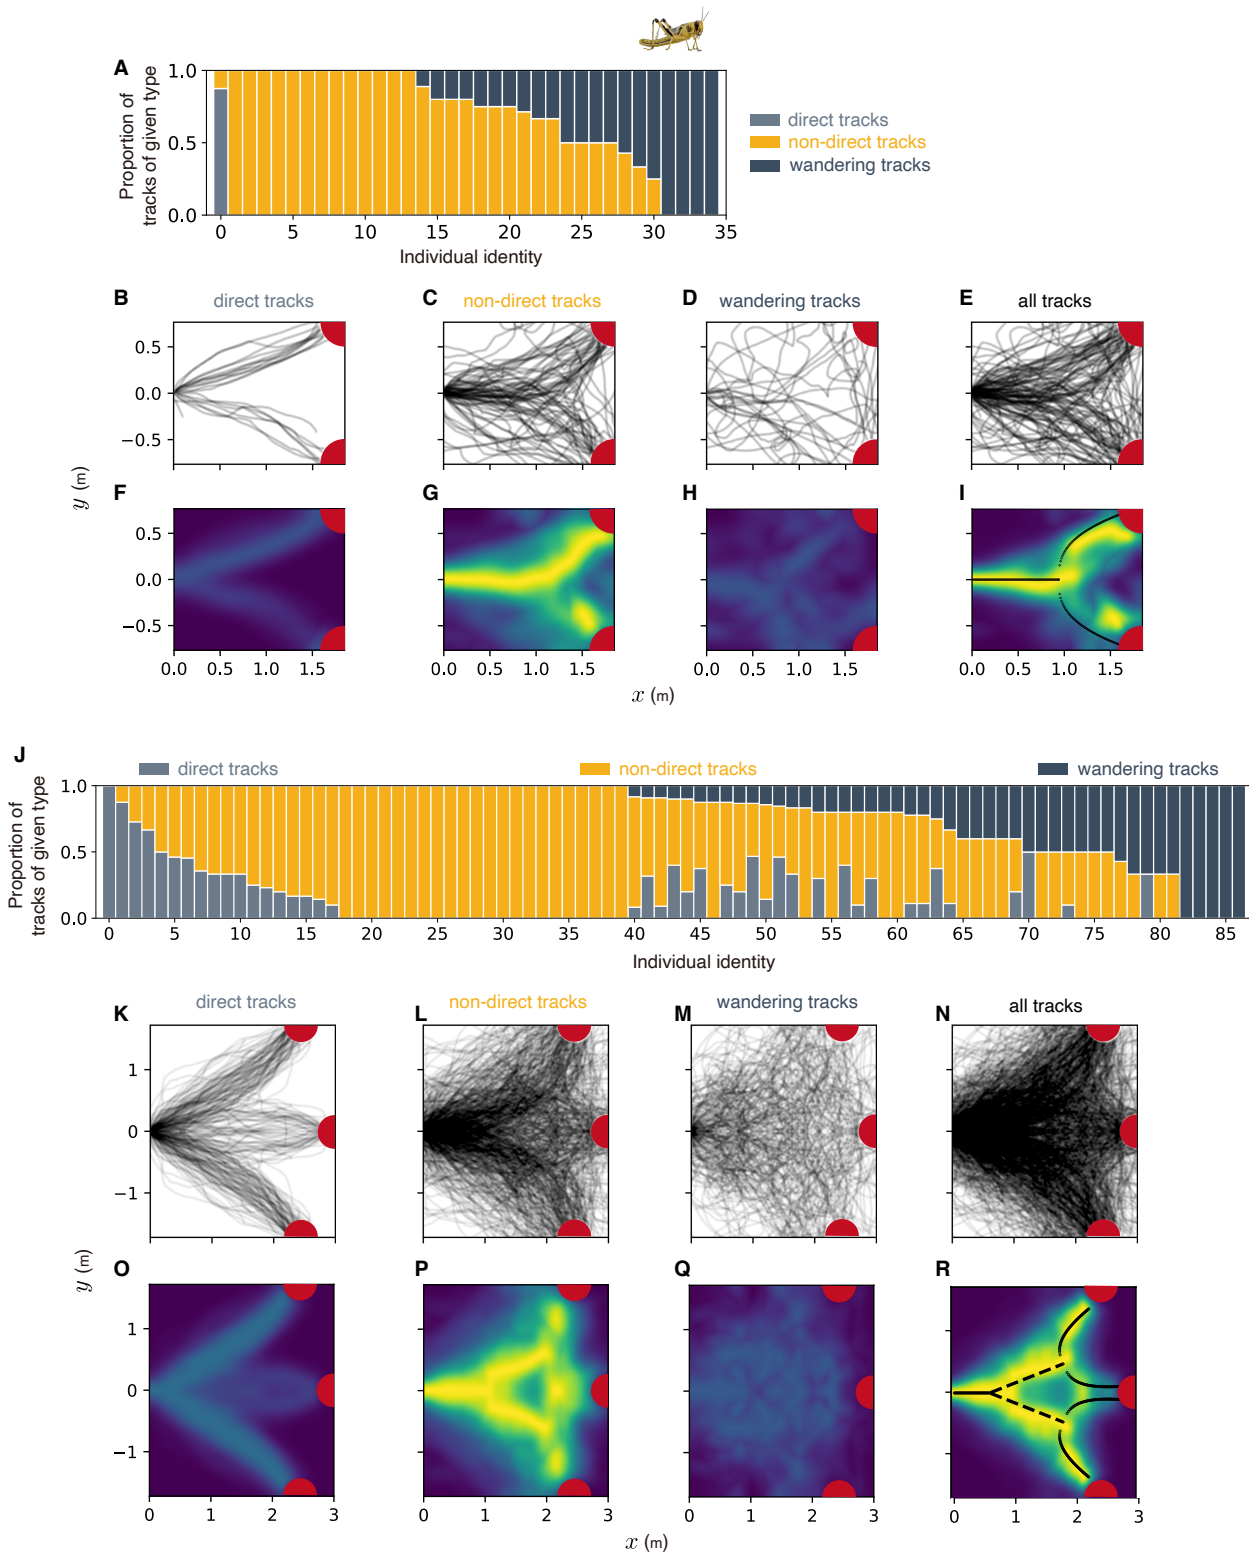

**Fig. S12.** Characterisation of desert locust tracks at the individual and population level when exposed to two and three targets. A and J show consistency in individual behavioral tendencies in exhibiting either direct, non-direct or wandering tracks. (B-I) present raw trajectories (B-E) and density plots (F-I) of locusts exposed to two targets. The axes represent  $x$ - and  $y$ -coordinates in Euclidean space. B shows trajectories where the locust reached the target in a relatively short duration, where trajectories to the targets were relatively direct, D shows trajectories where the locust took long to reach the target, where trajectories to the targets were noisy, and C shows the remaining trajectories. F-I show the corresponding density plots, normalized such that the maximum intensity in G is set to 1, and in F and H is set to the proportion of trajectories in G relative to this condition. E and I show the raw trajectories and the normalized density plot for all locust experiments combined. Similarly, K-R present raw trajectories (K-N) and density plots (O-R) of locusts exposed to three targets. K and O show direct trajectories to a target and the corresponding density plot, M and Q show noisy trajectories to a target and the corresponding density plot, and L and P show the remaining trajectories that potentially exhibit the bifurcations, and the corresponding density plot. N and R show raw trajectories and the density plot for all locust experiments combined. Note that the three-choice trajectories here are symmetrized for the sake of visualization. Our conclusions do not differ when we include all the locust data. To show this, we fit the piecewise phase transition function (shown in black) to density plots I and R.

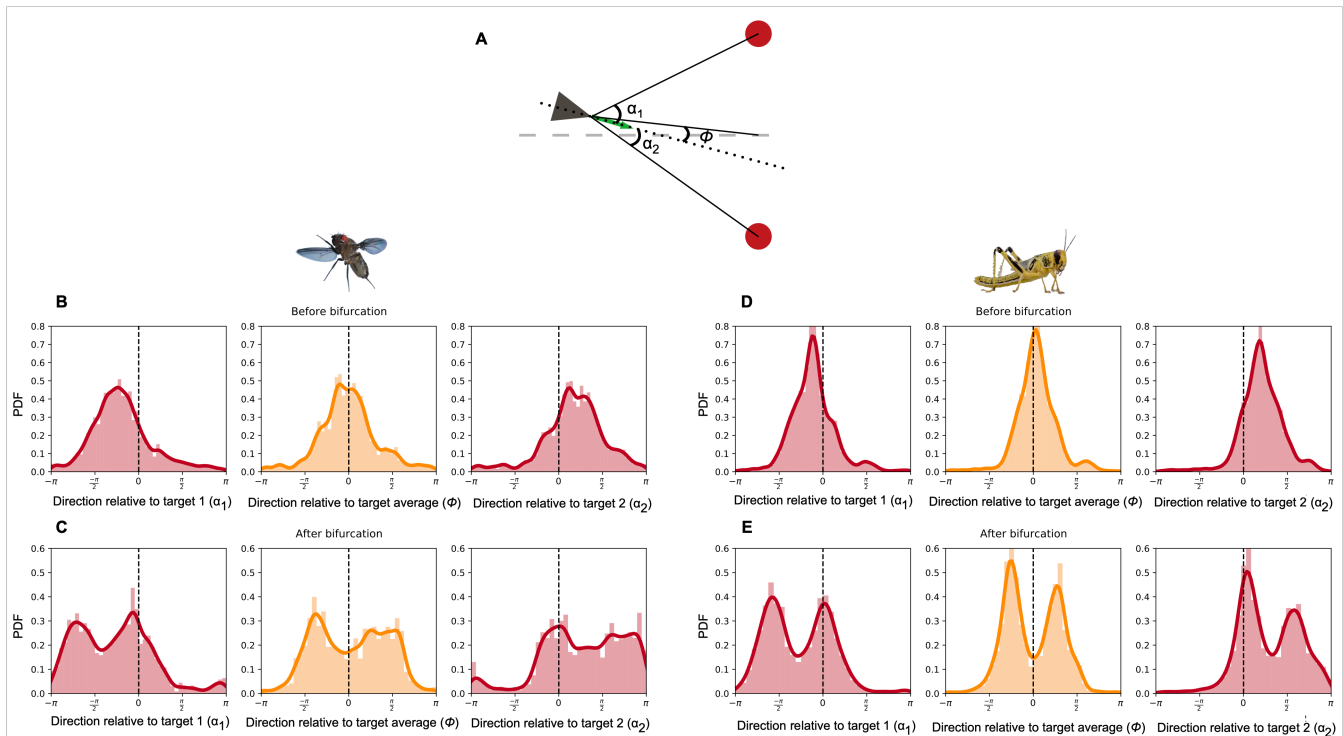

**Fig. S13.** Characterization of the direction of movement of fruit-flies and desert locusts in the non-direct tracks. (A) A schematic representation of the various reference frames used to characterize the animals' direction of movement—the green arrow represents the animals' velocity vector, the black dotted line is their current direction of movement,  $\alpha_1$  and  $\alpha_2$  represent movement direction relative to the two targets and  $\phi$  represents movement direction with respect to the average of the egocentric target directions. The grey dashed line is the perpendicular bisector of the line connecting the two targets. All animals start their experimental trial at a fixed distance from the targets on this line. (B and D) Before the bifurcation, both flies and locusts tend to direct their movement directly towards the average of the egocentric target directions ( $\phi$ ). Thus, they do not fixate on either target. Beyond the critical angular difference, however, (C and E) they switch from directing their motion towards the average of the target directions, to fixating on one, or other, of them and thus exhibiting directed motion towards the selected target (in the direction of  $\alpha_1$  or  $\alpha_2$  to target 1 or target 2 respectively). The second peak evident when this occurs, offset from the heading by a large angle, shows the direction towards the unselected target.

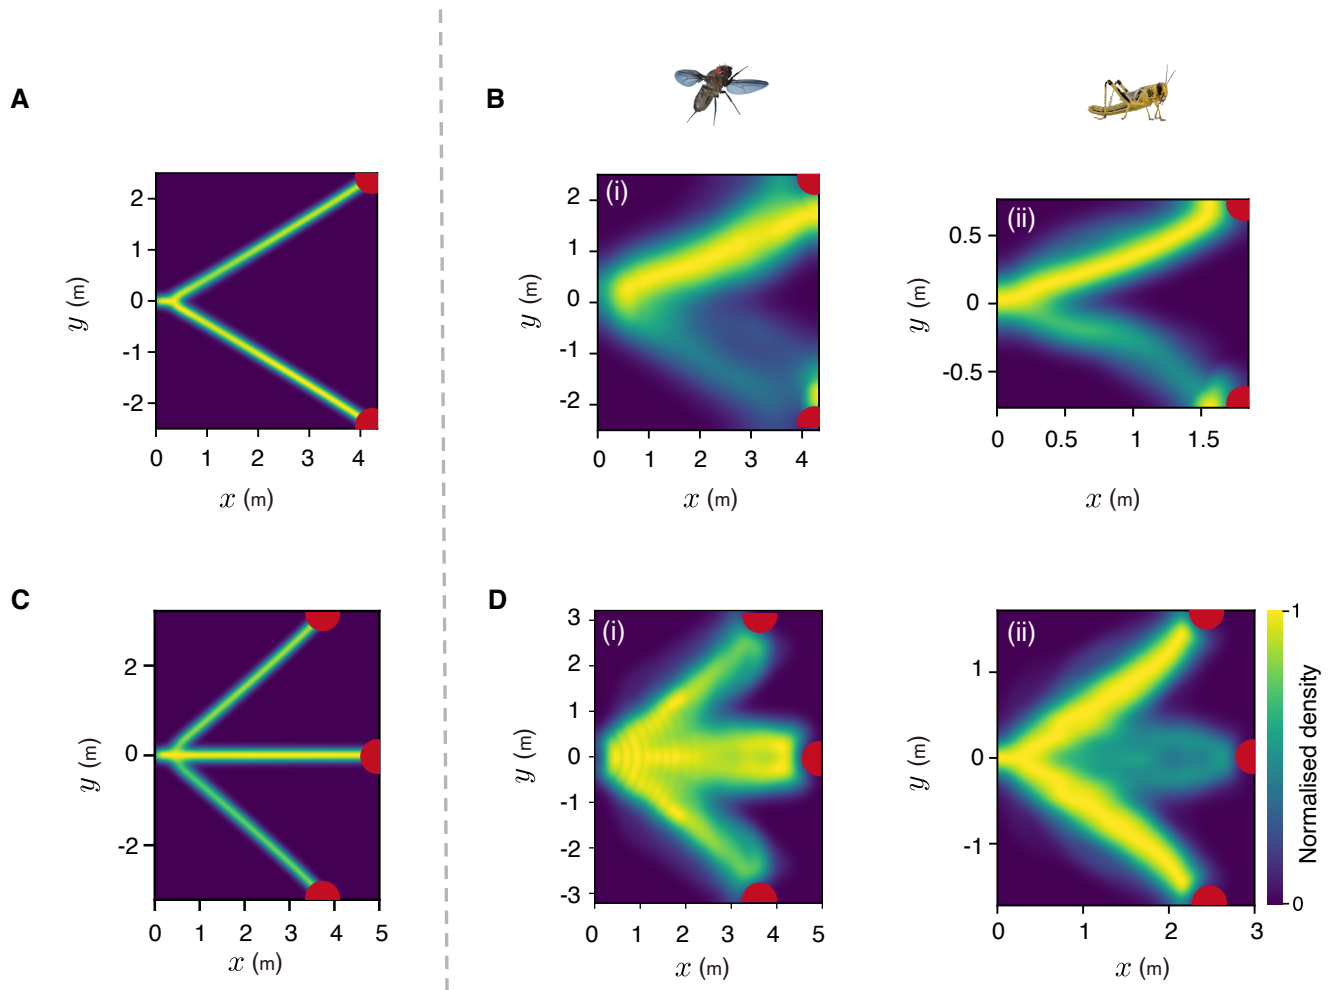

**Fig. S14.** Model results where the animal is predicted to directly approach one of the presented targets and corresponding trajectories from experiments with fruit flies and desert locusts. (A and C) Density plots of predicted trajectories for two and three-choice decision-making with high neural tuning ( $\nu = 0.2$ ). Under these parameter conditions, the model predicts that the animal should directly move towards one of the presented targets. (B and D) show density plots of corresponding direct tracks exhibited by fruit flies and desert locusts respectively.



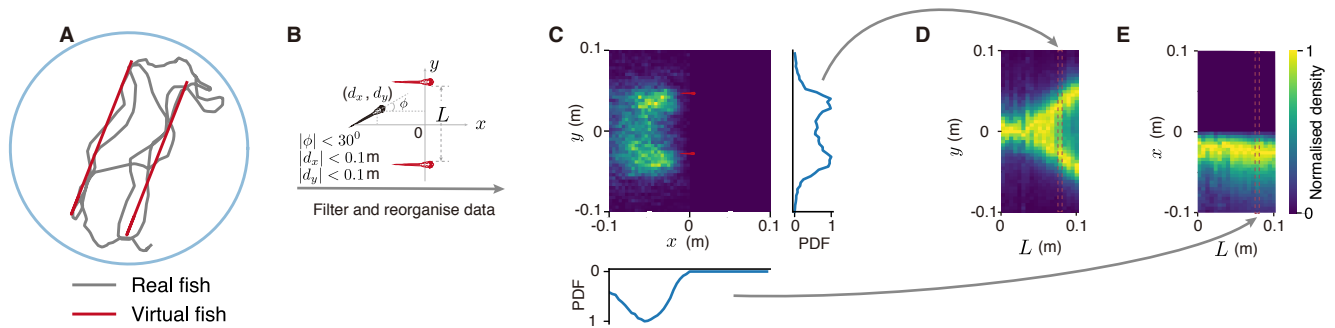

**Fig. S15.** Overview of experiments and data analyses with larval zebrafish. (A) Two virtual fish swim back-and-forth in the arena beside each other at varying lateral distances (0.08 m in this particular case). (B) Data were centered on a coordinate system with origin at the centroid of the virtual fish's positions and decisions were considered along the axis perpendicular to their direction of motion. (C) An example of the real fish's position density relative to the virtual fish. We obtain a normalized marginal probability distribution of the real fish's position (perpendicular to the virtual fish's movement direction) and stack these distributions for varying lateral distances between the virtual fish (D). We can do this without losing information along the virtual fish's movement direction as the real fish maintains relatively stable front-back distance with its virtual conspecifics (E).

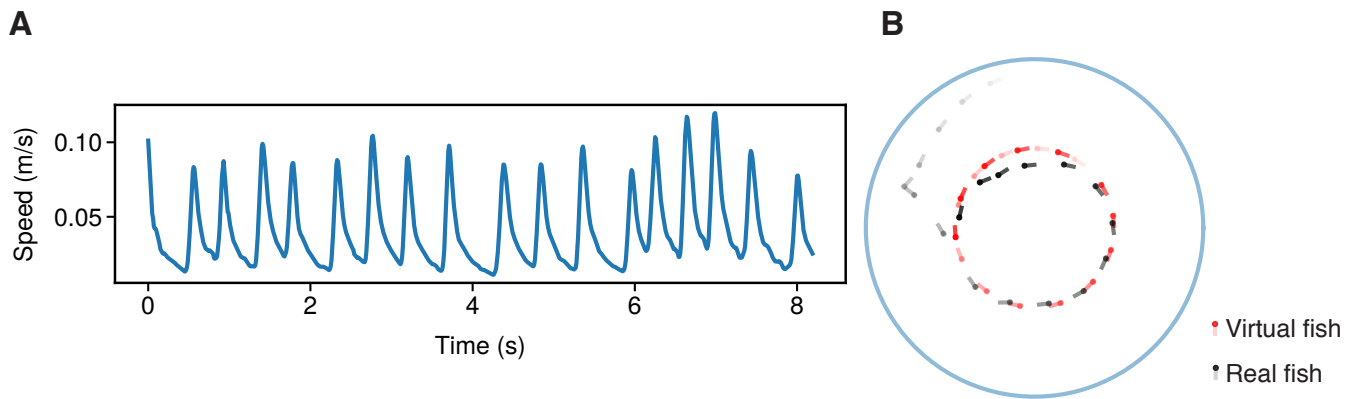

**Fig. S16.** Behavioral experiments with larval zebrafish in virtual reality. (A) Burst-and-glide movement adopted by the virtual zebrafish. The average movement speed was extracted statistically from freely swimming larval zebrafish and the burst-and-glide movement was adopted from a random real fish. (B) Interaction of the real fish with its virtual conspecific in one of the control runs where the virtual fish swims in a circular path.

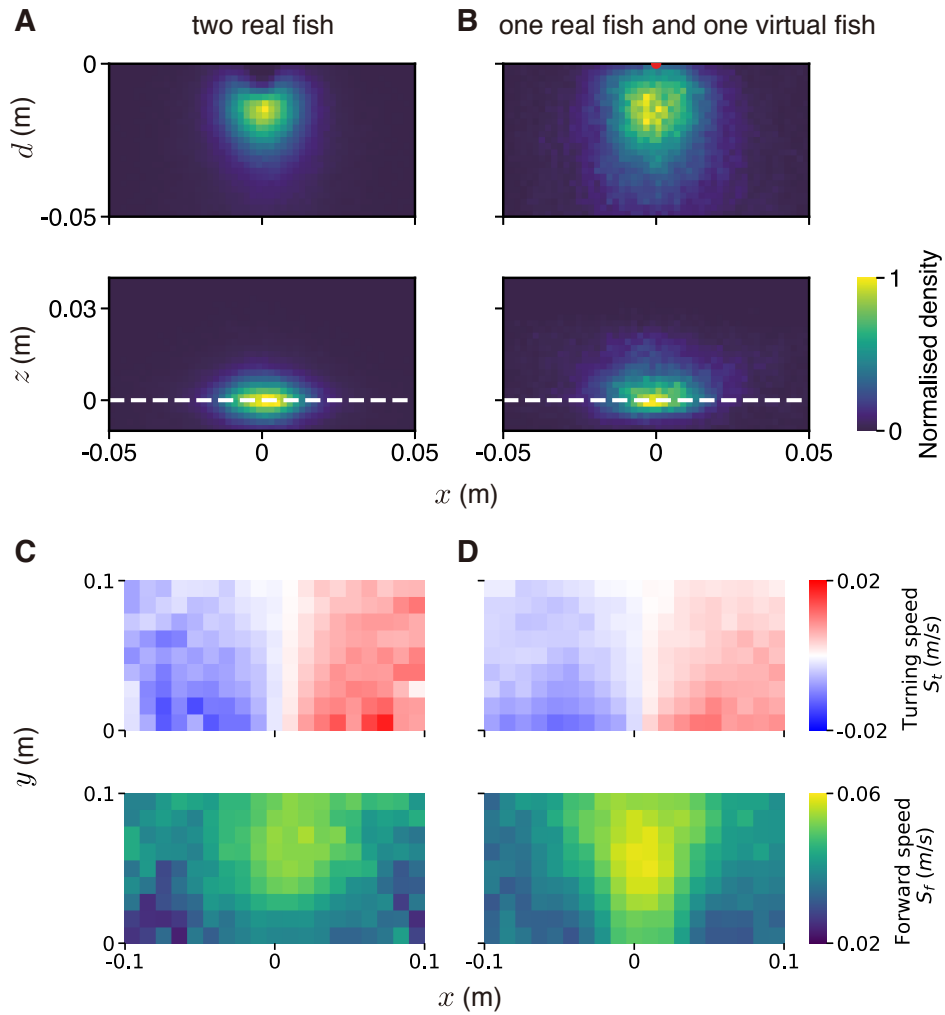

**Fig. S17.** Fish respond similarly to real and virtual conspecifics. Density plots from 3D tracking of pairs of fish within and without the VR. Both panels A and B represent the position of a follower in a coordinate system centered on the leader. The dashed line in B represents position of the leader on the  $z$ -plane. Panels C and D show the turning (left-right) and the forward (front-back) speeds of the follower in a coordinate system centered on the leader. (A and C) Two larval zebrafish swimming together. (B and D) A larval zebrafish swimming with a virtual conspecific.

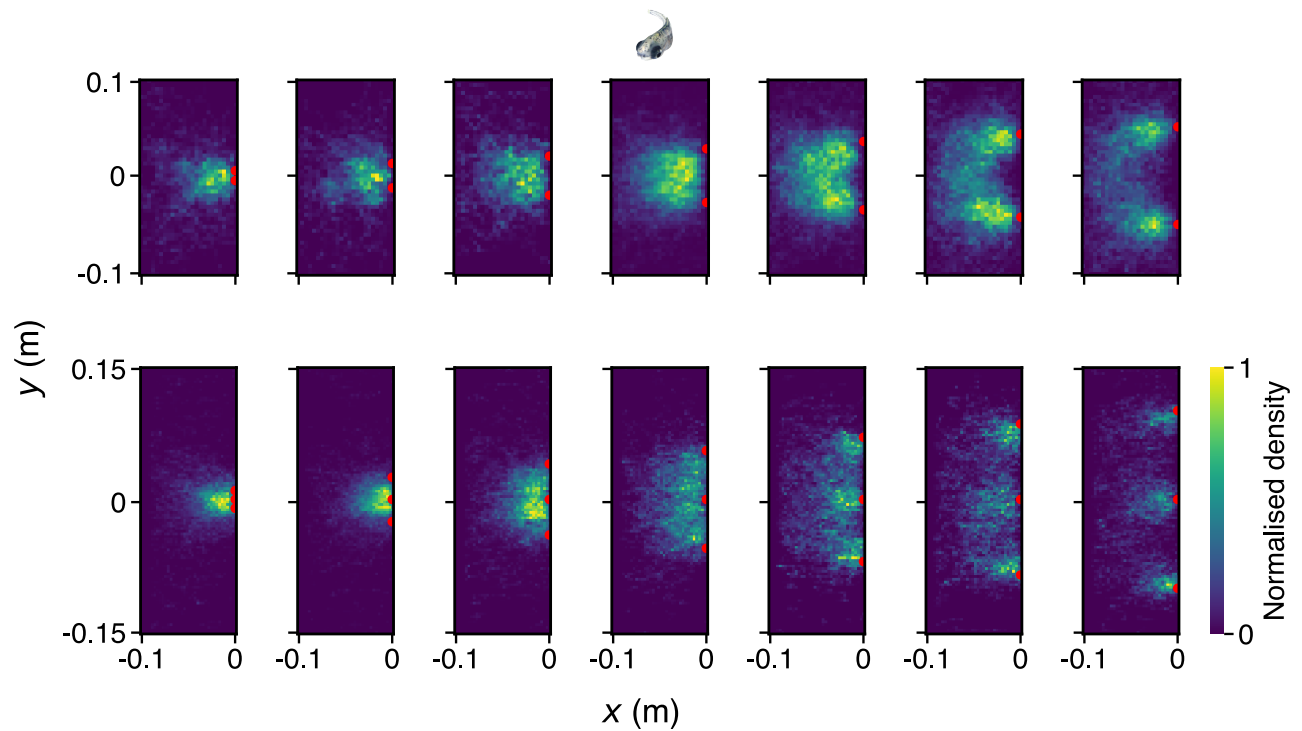

**Fig. S18.** Normalized density plots for larval zebrafish exposed to two or three virtual fish. The red dots represent positions of the virtual zebrafish that are presented to the real fish. Density plots represent position of the real fish as it follows these virtual fish. Top row presents positions of the real fish in presence of two virtual fish and the bottom row presents positions of the real fish in presence of three virtual fish.

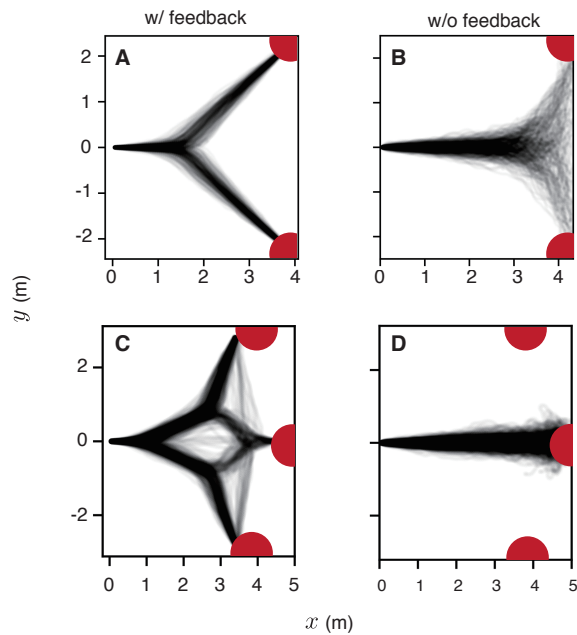

**Fig. S19.** Role of feedback in producing the experimentally observed bifurcations in a model of animal collectives. Trajectories resulting from a decision-making model of animal collectives with (A and C) and without feedback (B and D) on individual preferences (500 replicates). A and B show trajectories for decision-making in the presence of two targets, while C and D show trajectories for decision-making in the presence of three targets. The axes represent  $x$ - and  $y$ -coordinates in Euclidean space. See Table S2 for parameters used in A and C. For B and D, we removed explicit feedback on individual preferences by setting  $\omega_{inc} = 0$  and  $\omega_{dec} = 0$ . However, with no feedback, the group will almost always split into subgroups that all go to their preferred target. Hence, B and D also included uninformed individuals that function to keep the group together. In these simulations, each target was preferred by 12 individuals and the rest were uninformed—simulations with two options had 36 uninformed individuals out of 60 while the simulations with three options had 24 uninformed individuals.

**Table S1. An overview of the parameter values explored for the neural decision-making model.**

| Parameter                                    | Symbol          | Value(s) |
|----------------------------------------------|-----------------|----------|
| System size (simulations)                    | $N$             | 60       |
| Neural tuning                                | $\nu$           | 0.5      |
| Directional noise (simulations)              | $\sigma_e$      | 0.02     |
| Neural noise / Temperature                   | $T$             | 0.2      |
| Lateral distance in cm (fish simulations)    | $L$             | 0–10     |
| Front-back distance in cm (fish simulations) | $d$             | 1.5–3    |
| Directional error (overlap implementation)   | $\sigma_\theta$ | 0.25     |

**Table S2. An overview of the parameter values explored for the collective decision-making model.**

| Parameter                     | Symbol         | Value(s) |
|-------------------------------|----------------|----------|
| Total agents                  | $N$            | 60       |
| Repulsion radius              | $r_r$          | 1        |
| Attraction / Alignment radius | $r_a$          | 6        |
| Turning rate                  | $\psi$         | 2        |
| Speed                         | $ v $          | 1        |
| Omega initialization          | $\omega_0$     | 0.3      |
| Omega increment               | $\omega_{inc}$ | 0.012    |
| Omega decrement               | $\omega_{dec}$ | 0.0008   |
| Maximum omega                 | $\omega_{max}$ | 0.4      |
| Timestep increment            | $\Delta t$     | 0.1      |

593 **References**

- 594 1. I Pinkoviezky, ID Couzin, NS Gov, Collective conflict resolution in groups on the move. *Phys. Rev. E* **97** (2018).
- 595 2. SI Amari, Homogeneous nets of neuron-like elements. *Biol. cybernetics* **17**, 211–220 (1975).
- 596 3. Si Amari, Dynamics of pattern formation in lateral-inhibition type neural fields. *Biol. cybernetics* **27**, 77–87 (1977).
- 597 4. K Zhang, Representation of spatial orientation by the intrinsic dynamics of the head-direction cell ensemble: a theory. *J. Neurosci.* **16**, 2112–2126 (1996) Publisher: Society for Neuroscience Section: Articles.
- 598 5. X Sun, M Mangan, S Yue, An analysis of a ring attractor model for cue integration in *Conference on Biomimetic and Biohybrid Systems*. (Springer), pp. 459–470 (2018).
- 599 6. KS Kakaria, BL de Bivort, Ring attractor dynamics emerge from a spiking model of the entire protocerebral bridge. *Front. behavioral neuroscience* **11**, 8 (2017).
- 600 7. R Ben-Yishai, RL Bar-Or, H Sompolinsky, Theory of orientation tuning in visual cortex. *Proc. Natl. Acad. Sci.* **92**, 3844–3848 (1995).
- 601 8. DB Rubin, SD Van Hooser, KD Miller, The stabilized supralinear network: a unifying circuit motif underlying multi-input integration in sensory cortex. *Neuron* **85**, 402–417 (2015).
- 602 9. A Shpiro, R Moreno-Bote, N Rubin, J Rinzel, Balance between noise and adaptation in competition models of perceptual bistability. *J. computational neuroscience* **27**, 37–54 (2009).
- 603 10. K Wimmer, DQ Nykamp, C Constantinidis, A Compte, Bump attractor dynamics in prefrontal cortex explains behavioral precision in spatial working memory. *Nat. neuroscience* **17**, 431–439 (2014).
- 604 11. KF Wong, XJ Wang, A recurrent network mechanism of time integration in perceptual decisions. *J. Neurosci.* **26**, 1314–1328 (2006).
- 605 12. R Bogacz, EJ Wagenmakers, BU Forstmann, S Nieuwenhuis, The neural basis of the speed–accuracy tradeoff. *Trends neurosciences* **33**, 10–16 (2010).
- 606 13. SL Brunton, JL Proctor, JN Kutz, Discovering governing equations from data by sparse identification of nonlinear dynamical systems. *Proc. national academy sciences* **113**, 3932–3937 (2016).
- 607 14. SH Rudy, SL Brunton, JL Proctor, JN Kutz, Data-driven discovery of partial differential equations. *Sci. Adv.* **3**, e1602614 (2017).
- 608 15. E Montbrió, D Pazó, A Roxin, Macroscopic description for networks of spiking neurons. *Phys. Rev. X* **5**, 021028 (2015).
- 609 16. SS Kim, H Rouault, S Druckmann, V Jayaraman, Ring attractor dynamics in the Drosophila central brain. *Science* **356**, 849–853 (2017).
- 610 17. A Seeholzer, M Deger, W Gerstner, Stability of working memory in continuous attractor networks under the control of short-term plasticity. *PLoS computational biology* **15**, e1006928 (2019).
- 611 18. BM McCoy, TT Wu, *The two-dimensional Ising model: second edition*. (Courier Corporation), (2014).
- 612 19. YC Li, HQ Lin, Thermal quantum and classical correlations and entanglement in the xy spin model with three-spin interaction. *Phys. Rev. A* **83**, 052323 (2011).
- 613 20. JJ Hopfield, Neural networks and physical systems with emergent collective computational abilities. *Proc. national academy sciences* **79**, 2554–2558 (1982).
- 614 21. KG Wilson, The renormalization group and critical phenomena. *Rev. Mod. Phys.* **55**, 583 (1983).
- 615 22. E Schneidman, MJ Berry, R Segev, W Bialek, Weak pairwise correlations imply strongly correlated network states in a neural population. *Nature* **440**, 1007–1012 (2006).
- 616 23. A Bahl, F Engert, Neural circuits for evidence accumulation and decision making in larval zebrafish. *Nat. Neurosci.* **23**, 94–102 (2020).
- 617 24. L Benedetti-Cecchi, L Tamburello, E Maggi, F Bulleri, Experimental perturbations modify the performance of early warning indicators of regime shift. *Curr. Biol.* **25**, 1867–1872 (2015).
- 618 25. C Boettiger, A Hastings, From patterns to predictions. *Nature* **493**, 157–158 (2013).
- 619 26. E Horn, R Wehner, The mechanism of visual pattern fixation in the walking fly, *Drosophila melanogaster*. *J. Comp. Physiol. A* **101**, 39–56 (1975).
- 620 27. A Gelblum, et al., Ant groups optimally amplify the effect of transiently informed individuals. *Nat. Commun.* **6** (2015).
- 621 28. RJ Glauber, Time-dependent statistics of the Ising model. *J. Math. Phys.* **4**, 294–307 (1963) Publisher: American Institute of Physics.
- 622 29. RK Pathria, *Statistical Mechanics*. (Elsevier Science & Technology Books), (1972) Google-Books-ID: ejUVnQEACAAJ.
- 623 30. JD Seelig, V Jayaraman, Neural dynamics for landmark orientation and angular path integration. *Nature* **521**, 186–191 (2015).
- 624 31. DS Touretzky, Attractor network models of head direction cells. *Head direction cells neural mechanisms spatial orientation*, 411–432 (2005).
- 625 32. LC York, MCW van Rossum, Recurrent networks with short term synaptic depression. *J. Comput. Neurosci.* **27**, 607–620 (2009).
- 626 33. A Sarel, A Finkelstein, L Las, N Ulanovsky, Vectorial representation of spatial goals in the hippocampus of bats. *Science* **355**, 176–180 (2017).
- 627 34. JS Taube, RU Muller, JB Ranck, Head-direction cells recorded from the postsubiculum in freely moving rats. II. Effects of environmental manipulations. *J. Neurosci.* **10**, 436–447 (1990).
- 628 35. D Hansel, H Sompolinsky, modeling feature selectivity in local cortical circuits,(1998). (13).



- 654 36. PC Bressloff, Stochastic neural field model of stimulus-dependent variability in cortical neurons. *PLOS Comput. Biol.* **15**,  
655 e1006755 (2019) Publisher: Public Library of Science.
- 656 37. S Verdonck, F Tuerlinckx, The ising decision maker: A binary stochastic network for choice response time. *Psychol. review*  
657 **121**, 422 (2014).
- 658 38. S Salinas, *Introduction to Statistical Physics.* (Springer Science & Business Media), (2001) Google-Books-ID:  
659 VNIqa\_JE2JcC.
- 660 39. Y Roudi, E Aurell, JA Hertz, Statistical physics of pairwise probability models. *Front. computational neuroscience* **3**, 22  
661 (2009).
- 662 40. D Biro, DJT Sumpter, J Meade, T Guilford, From compromise to leadership in pigeon homing. *Curr. Biol.* **16**, 2123–2128  
663 (2006).
- 664 41. ID Couzin, et al., Uninformed Individuals Promote Democratic Consensus in Animal Groups. *Science* **334**, 1578–1580  
665 (2011).
- 666 42. A Strandburg-Peshkin, DR Farine, ID Couzin, MC Crofoot, Shared decision-making drives collective movement in wild  
667 baboons. *Science* **348**, 1358–1361 (2015).
- 668 43. ID Couzin, J Krause, NR Franks, SA Levin, Effective leadership and decision-making in animal groups on the move.  
669 *Nature* **433**, 4 (2005).
- 670 44. GA Linneweber, et al., A neurodevelopmental origin of behavioral individuality in the drosophila visual system. *Science*  
671 **367**, 1112–1119 (2020).
- 672 45. FR Kiral, et al., Variable brain wiring through scalable and relative synapse formation in drosophila. *bioRxiv* (2021).
- 673 46. JR Stowers, et al., Virtual reality for freely moving animals. *Nat. Methods* **14**, 995–1002 (2017).
- 674 47. U Kaupert, et al., Spatial cognition in a virtual reality home-cage extension for freely moving rodents. *J. Neurophysiol.*,  
675 1736–1748 (2017) Number: 4 Publisher: Ludwig-Maximilians-Universität München.
- 676 48. D Bierbach, KL Laskowski, M Wolf, Behavioural individuality in clonal fish arises despite near-identical rearing conditions.  
677 *Nat. communications* **8**, 1–7 (2017).
- 678 49. W Schuett, et al., Personality variation in a clonal insect: the pea aphid, *acyrthosiphon pisum*. *Dev. psychobiology* **53**,  
679 631–640 (2011).
- 680 50. J Freund, et al., Emergence of individuality in genetically identical mice. *Science* **340**, 756–759 (2013).
- 681 51. G Vogt, Investigating the genetic and epigenetic basis of big biological questions with the parthenogenetic marbled crayfish:  
682 A review and perspectives. *J. Biosci.* **43**, 189–223 (2018).
- 683 52. H Sompolinsky, R Shapley, New perspectives on the mechanisms for orientation selectivity. *Curr. Opin. Neurobiol.* **7**,  
684 514–522 (1997).
